# Supplementary material for: HNRNPH1 regulates the neuroprotective cold‐shock protein RBM3 expression through poison exon exclusion
Source: PubMed Central journal article supplement (PMC10350819; doi:10.15252/embj.2022113168), 2023-05-30
Supplement: EMBJ-42-e113168-s003.pdf [file EMBJ-42-e113168-s003.pdf]

## Appendix Supplementary Tables

**Appendix Table S1** Single-guide RNA (sgRNA) and primer (Pr) sequences used in this study (Page 2)

**Appendix Table S2** RBM3 positive and negative regulator candidates identified by pooled CRISPR knockout screen (Page 5)

**Appendix Table S3** A complete list of significant Gene Ontology (GO) terms of RBM3 positive and negative regulators (Page 16)

**Appendix Table S4** sgRNA sequences used in arrayed target validation (Page 23)

**Appendix Table S5** TPM of RBM3 mRNA upon specified RBM3 regulator KD compared to the control in K562 and HepG2 cells from ENCODE (Page 33)

**Appendix Table S6** Analysis of RBM3 transcript alternative splicing in HNRNPH1 KD versus WT i-neurons, K562 and HepG2 cells by rMATS (Page 34)

**Appendix Table S7** Key resources used in this study (Page 35)

**Appendix Table S1** Single-guide RNA (sgRNA) and primer (Pr) sequences used in this study

| Number | Name                     | Sequence (5' -> 3')                                                                              |
|--------|--------------------------|--------------------------------------------------------------------------------------------------|
| Pr1    | AmpOri_RBM3-N-5HA_Fw     | GGTTCCGCGCACATTTCCTCCGAAAAGTGCCTGAAGGAGGTTAACATCAGAGAATGGCA                                      |
| Pr2    | RBM3-N-5HA_GFP_Rv        | GGTGAACAGCTCCTCGCCCTTGCTCACCATGGCAGTTCAAGTCTGTGGGAAGAACATGA                                      |
| Pr3    | RBM3-N-5HA_GFP_Fw        | TCATGTTCTTCCCACAGGACTTGAAGTCCATGGTGAAGCAAGGGCGAGGAGCTGTTCCACC                                    |
| Pr4    | GFP_linker_RBM3-N-3HA_Rv | TCCCACGAAGAGCTTTCCTTCTTCAGAGGAGAATTCTCCTGAACCGGCCGCCGATCCTGCGGAGCCCTTGTACAGCTCGTCCATGCCGAGAG     |
| Pr5    | GFP_linker_RBM3-N-3HA_Fw | ATCACTCTCGGCATGGACGAGCTGTACAAGGGCTCCGCAGGATCGGCCGCCGGTTCAGGAGAATTCTCCTCTGAAGAAGGAAAGCTCTTCGTGGGA |
| Pr6    | RBM3-N-3HA_AmpOri_Rv     | CTGGCACGACAGGTTTCCCGACTGGAAAGCAAGCTGCCCGACTATCAGGGCTAGACAGAC                                     |
| Pr7    | RBM3-N-3HA_AmpOri_Fw     | GTCTGTCTAGCCCTGATAGTCGGGCAGCTTGCTTTCCAGTCGGGAAACCTGTCGTGCCAG                                     |
| Pr8    | AmpOri_RBM3-N-5HA_Rv     | TGCCATTCTCTGATGTTAACCTCCTTACCAGCACTTTTCGGGGAAATGTGCGCGGAACCC                                     |
| Pr9    | RBM3-N_ssDNA_PF          | (5'-phosphorylated) CGTGCTTGGAGGTGAAACATTTCCG                                                    |
| Pr10   | RBM3-N_ssDNA_R           | GCTCTCATGGCAACTGAAGCA                                                                            |
| Pr11   | GT_RBM3-N_ssDNA_F        | TGCATATGTCCTGCGAAACG                                                                             |
| Pr12   | GT_RBM3-N_ssDNA_R        | AGTCATGCTCCTGTGAGTGG                                                                             |
| Pr13   | GT_GFP_F                 | GCGAGGAGCTGTTCCACCGG                                                                             |
| Pr14   | GT_GFP_R                 | CCATGTGATCGCGCTTCTCGT                                                                            |
| Pr15   | Vector 1st half_Fw       | CGACCGGTAGCGCTAGGATCCCCCTGGGGAGAGAGGTCGGTGATTCCG                                                 |
| Pr16   | Vector 1st half_Rv       | CTCTGCTAATCCTGTTACCAGTGGCTGC                                                                     |
| Pr17   | Vector 2nd half_Fw       | GCAGCCACTGGTAACAGGATTAGCAGAG                                                                     |
| Pr18   | Vector 2nd half_Rv       | ACCCAGCTTTCTGTACAAAGTGGT                                                                         |
| Pr19   | HNRNPH1_Fw               | GGGGATCCTAGCGCTACCGGTGCCACCATGATGTTGGGCACGGAAGGTGGAG                                             |
| Pr20   | HNRNPH1_Rv               | GACTTCCTCTGCCCTCACCAGGATCCTGCAATGTTTGATTGAAAATCACTGGAGTTTTCC                                     |

|      |                             |                                                         |
|------|-----------------------------|---------------------------------------------------------|
| Pr21 | T2A-TagBFP_Fw               | GGATCCGGTGAGGGCAGAGGAAGTC                               |
| Pr22 | T2A-TagBFP_Rv               | ACCACTTTGTACAAGAAAGCTGGGTCAATTAAGCTTGTGCCCCAGTTTGCTAGGG |
| Pr23 | qPCR_h18S_F                 | GTAACCCGTTGAACCCATT                                     |
| Pr24 | qPCR_h18S_R                 | CCATCCAATCGGTAGTAGCG                                    |
| Pr25 | qPCR_hRBM3_e3_F             | GGACCTATCTCTGAGGTGGTCCG                                 |
| Pr26 | qPCR_hRBM3_e3_R             | TTCATGGCTCTCATGGCAACTG                                  |
| Pr27 | qPCR_hRBM3_e4-5_F           | TCAGATCCGTGTGGATCATG                                    |
| Pr28 | qPCR_hRBM3_e4-5_R           | TAATACCTGCCACTCCCATAGCC                                 |
| Pr29 | qPCR_hRBM3_e3a_F            | GTAGTAGAGTCTGCAGACCTGTGG                                |
| Pr30 | qPCR_hRBM3_e3a_R            | TCCTCTAAGCTGCCCGACTATC                                  |
| Pr31 | hRBM3_RTPCR_fwd_DK79        | GTGGGAGGGCTCAACTTTAAC                                   |
| Pr32 | hRBM3_RTPCR_rev_DK80        | CATGATCCACACGGATCTGAC                                   |
| Pr33 | hRBM3_RTPCR_fwd pair 2_DK81 | AGGACCGGGAGACTCAGC                                      |
| Pr34 | hRBM3_RTPCR_rev pair 2_DK82 | AGCCACCTCCTCTGGTTC                                      |
| Pr35 | hRBM3_Minigene_fwd_DK20F    | GCTCGGATCCACTAGTCCAGTGT                                 |
| Pr36 | hRBM3_Minigene_rev_DK21R    | GTTTAAACGGGCCCTCTAGACT                                  |
| Pr37 | hRBM3 qPCR ex2_fwd_DK30     | TCAGCAGTTTCGGACCTATC                                    |
| Pr38 | hRBM3 qPCR ex3_rev_DK31     | CATGCTCTGGGTTGGTGAAG                                    |
| Pr39 | GAPDH qPCR_fwd              | CCAGAACATCATCCCTGCCT                                    |
| Pr40 | GAPDH qPCR_rev              | GGTCAGGTCCACCACTGACA                                    |
| Pr41 | mRBM3 ex2 f_DK184           | CTGCCATGTCGTCTG                                         |
| Pr42 | mRBM3 ex4 r_DK185           | GATTTGGCGCCCATC                                         |
| Pr43 | HNRNPH qPCR_fwd             | GGCCAATGATGGCTTTGTACG                                   |

|         |                            |                                                        |
|---------|----------------------------|--------------------------------------------------------|
| Pr44    | HNRNPH qPCR_rev            | AGTCCACCGCAATGTTATCC                                   |
| Pr45    | hRBM3 qPCR_premRNA_ex2_fwd | TGGGAGGGCTCAACTTTAAC                                   |
| Pr46    | hRBM3 qPCR_premRNA_in2_rev | TGCAAGGATCCCAGACTTTC                                   |
| Pr47    | qPCR_hHNRNPH1e11_F         | GTGGTGCTTACGAACACAGATATG                               |
| Pr48    | qPCR_hHNRNPH1e11_R         | GCTGGACTGGTTTGACAAGC                                   |
| Pr49    | Pi7_PLVPBnewSeq            | GTCTCGTGGGCTCGGAGATGTGTATAAGAGACAGACTCGGTGCCACTTTTTCAA |
| Pr50    | Pi5_PLVPBnobarcode         | TCGTCCGCAGCGTCAGATGTGTATAAGAGACAGTCTTGTGGAAAGGACGAAACA |
| iP7_1n  | Q7005                      | CAAGCAGAAGACGGCATAACGAGATATATTCACGTCTCGTGGGCTCGG       |
| iP7_2n  | Q7006                      | CAAGCAGAAGACGGCATAACGAGATGCGCCTGTGTCTCGTGGGCTCGG       |
| iP7_3n  | Q7007                      | CAAGCAGAAGACGGCATAACGAGATACTCTATGGTCTCGTGGGCTCGG       |
| iP7_4n  | Q7008                      | CAAGCAGAAGACGGCATAACGAGATGTCTCGCAGTCTCGTGGGCTCGG       |
| iP7_5n  | Q7015                      | CAAGCAGAAGACGGCATAACGAGATAGTAGAGAGTCTCGTGGGCTCGG       |
| iP7_6n  | Q7016                      | CAAGCAGAAGACGGCATAACGAGATGACGAGAGGTCTCGTGGGCTCGG       |
| iP7_7n  | Q7017                      | CAAGCAGAAGACGGCATAACGAGATAGACTTGGGTCTCGTGGGCTCGG       |
| iP7_8n  | Q7018                      | CAAGCAGAAGACGGCATAACGAGATGAGTCCAAGTCTCGTGGGCTCGG       |
| iP7_9n  | Q7023                      | CAAGCAGAAGACGGCATAACGAGATAATTCTGCGTCTCGTGGGCTCGG       |
| iP7_10n | Q7024                      | CAAGCAGAAGACGGCATAACGAGATGGCCTCATGTCTCGTGGGCTCGG       |
| iP7_11n | Q7025                      | CAAGCAGAAGACGGCATAACGAGATATCTTAGTGTCTCGTGGGCTCGG       |
| iP7_12n | Q7026                      | CAAGCAGAAGACGGCATAACGAGATGCTCCGACGTCTCGTGGGCTCGG       |
| iP5_1n  | Q5001                      | AATGATACGGCGACCACCGAGATCTACACAGCGCTAGTCGTGGCAGCGTC     |
| iP5_2n  | Q5002                      | AATGATACGGCGACCACCGAGATCTACACGATATCGATCGTCGGCAGCGTC    |
| iP5_3n  | Q5003                      | AATGATACGGCGACCACCGAGATCTACACCGCAGACGTCTGGCAGCGTC      |
| iP5_4n  | Q5004                      | AATGATACGGCGACCACCGAGATCTACACTATGAGTATCGTCGGCAGCGTC    |

|        |       |                                                     |
|--------|-------|-----------------------------------------------------|
| iP5_5n | Q5007 | AATGATACGGCGACCACCGAGATCTACACACATAGCGTCGTCGGCAGCGTC |
| iP5_6n | Q5008 | AATGATACGGCGACCACCGAGATCTACACGTGCGATATCGTCGGCAGCGTC |
| iP5_7n | Q5009 | AATGATACGGCGACCACCGAGATCTACACCCAACAGATCGTCGGCAGCGTC |
| iP5_8n | Q5010 | AATGATACGGCGACCACCGAGATCTACACTTGGTGAGTCGTCGGCAGCGTC |

**Appendix Table S2** RBM3 positive and negative regulator candidates identified by pooled CRISPR knockout screen

| Positive/Negative regulator | Rank | ID              | Gene symbol | FDR      |
|-----------------------------|------|-----------------|-------------|----------|
| Positive                    | 1    | ENSG00000169045 | HNRNPH1     | 0.00165  |
| Positive                    | 2    | ENSG00000102317 | RBM3        | 0.00165  |
| Positive                    | 3    | ENSG00000064419 | TNPO3       | 0.00165  |
| Positive                    | 4    | ENSG00000132424 | PNISR       | 0.00165  |
| Positive                    | 5    | ENSG00000086758 | HUWE1       | 0.00165  |
| Positive                    | 6    | ENSG00000104852 | SNRNP70     | 0.00165  |
| Positive                    | 7    | ENSG00000179950 | PUF60       | 0.001856 |
| Positive                    | 8    | ENSG00000118263 | KLF7        | 0.001856 |
| Positive                    | 9    | ENSG00000130699 | TAF4        | 0.0022   |
| Positive                    | 10   | ENSG00000130811 | EIF3G       | 0.009406 |
| Positive                    | 11   | ENSG00000177600 | RPLP2       | 0.009451 |
| Positive                    | 12   | ENSG00000106263 | EIF3B       | 0.021325 |
| Positive                    | 13   | ENSG00000141867 | BRD4        | 0.021325 |
| Positive                    | 14   | ENSG00000108848 | LUC7L3      | 0.032885 |
| Positive                    | 15   | ENSG00000151651 | ADAM8       | 0.047855 |

|          |    |                 |          |          |
|----------|----|-----------------|----------|----------|
| Positive | 16 | ENSG00000134684 | YARS     | 0.064356 |
| Positive | 17 | ENSG00000120156 | TEK      | 0.064356 |
| Positive | 18 | ENSG00000131759 | RARA     | 0.115787 |
| Positive | 19 | ENSG00000165417 | GTF2A1   | 0.16493  |
| Positive | 20 | ENSG00000087095 | NLK      | 0.200495 |
| Positive | 21 | ENSG00000136485 | DCAF7    | 0.200495 |
| Positive | 22 | ENSG00000099139 | PCSK5    | 0.200495 |
| Positive | 23 | ENSG00000187758 | ADH1A    | 0.251031 |
| Positive | 24 | ENSG00000120833 | SOCS2    | 0.251031 |
| Positive | 25 | ENSG00000196361 | ELAVL3   | 0.252277 |
| Positive | 26 | ENSG00000171861 | MRM3     | 0.255331 |
| Positive | 27 | ENSG00000062038 | CDH3     | 0.281628 |
| Positive | 28 | ENSG00000135750 | KCNK1    | 0.291396 |
| Positive | 29 | ENSG00000174125 | TLR1     | 0.291396 |
| Positive | 30 | ENSG00000155545 | MIER3    | 0.306106 |
| Positive | 31 | ENSG00000100393 | EP300    | 0.331219 |
| Positive | 32 | ENSG00000182831 | C16orf72 | 0.331219 |
| Positive | 33 | ENSG00000170852 | KBTBD2   | 0.358836 |
| Positive | 34 | ENSG00000105327 | BBC3     | 0.479663 |
| Positive | 35 | ENSG00000172935 | MRGPRF   | 0.479663 |
| Positive | 36 | ENSG00000084623 | EIF3I    | 0.479663 |
| Positive | 37 | ENSG00000056097 | ZFR      | 0.479663 |
| Positive | 38 | ENSG00000126247 | CAPNS1   | 0.54703  |

|          |    |                 |         |          |
|----------|----|-----------------|---------|----------|
| Positive | 39 | ENSG00000080618 | CPB2    | 0.547728 |
| Positive | 40 | ENSG00000156531 | PHF6    | 0.606312 |
| Positive | 41 | ENSG00000172530 | BANP    | 0.613258 |
| Positive | 42 | ENSG00000065427 | KARS    | 0.69791  |
| Positive | 43 | ENSG00000153046 | CDYL    | 0.69791  |
| Positive | 44 | ENSG00000174080 | CTSF    | 0.69791  |
| Positive | 45 | ENSG00000122741 | DCAF10  | 0.69791  |
| Positive | 46 | ENSG00000198380 | GFPT1   | 0.704162 |
| Positive | 47 | ENSG00000184254 | ALDH1A3 | 0.704162 |
| Positive | 48 | ENSG00000175197 | DDIT3   | 0.704162 |
| Positive | 49 | ENSG00000176896 | TCEANC  | 0.704162 |
| Positive | 50 | ENSG00000138741 | TRPC3   | 0.704162 |
| Positive | 51 | ENSG00000170091 | NSG2    | 0.704162 |
| Positive | 52 | ENSG00000028203 | VEZT    | 0.704162 |
| Positive | 53 | ENSG00000131469 | RPL27   | 0.704162 |
| Positive | 54 | ENSG00000160678 | S100A1  | 0.704162 |
| Positive | 55 | ENSG00000099957 | P2RX6   | 0.709361 |
| Positive | 56 | ENSG00000169230 | PRELID1 | 0.751149 |
| Positive | 57 | ENSG00000130032 | PRRG3   | 0.798072 |
| Positive | 58 | ENSG00000176946 | THAP4   | 0.801087 |
| Positive | 59 | ENSG00000144035 | NAT8    | 0.801087 |
| Positive | 60 | ENSG00000119714 | GPR68   | 0.801087 |
| Positive | 61 | ENSG00000133067 | LGR6    | 0.801087 |

|          |    |                 |          |          |
|----------|----|-----------------|----------|----------|
| Positive | 62 | ENSG00000177963 | RIC8A    | 0.824098 |
| Positive | 63 | ENSG00000090861 | AARS     | 0.82418  |
| Positive | 64 | ENSG00000184156 | KCNQ3    | 0.82418  |
| Positive | 65 | ENSG00000213988 | ZNF90    | 0.824476 |
| Positive | 66 | ENSG00000125648 | SLC25A23 | 0.824476 |
| Positive | 67 | ENSG00000107331 | ABCA2    | 0.824476 |
| Positive | 68 | ENSG00000108443 | RPS6KB1  | 0.824476 |
| Positive | 69 | ENSG00000106615 | RHEB     | 0.834912 |
| Positive | 70 | ENSG00000181222 | POLR2A   | 0.856223 |
| Positive | 71 | ENSG00000115942 | ORC2     | 0.85783  |
| Positive | 72 | ENSG00000186487 | MYT1L    | 0.88937  |
| Positive | 73 | ENSG00000038002 | AGA      | 0.898617 |
| Negative | 1  | ENSG00000102241 | HTATSF1  | 0.000381 |
| Negative | 2  | ENSG00000119801 | YPEL5    | 0.000381 |
| Negative | 3  | ENSG00000108424 | KPNB1    | 0.000381 |
| Negative | 4  | ENSG00000162923 | WDR26    | 0.000381 |
| Negative | 5  | ENSG00000146457 | WTAP     | 0.000381 |
| Negative | 6  | ENSG00000176887 | SOX11    | 0.000381 |
| Negative | 7  | ENSG00000122692 | SMU1     | 0.000381 |
| Negative | 8  | ENSG00000122882 | ECD      | 0.000381 |
| Negative | 9  | ENSG00000129351 | ILF3     | 0.000381 |
| Negative | 10 | ENSG00000165699 | TSC1     | 0.000381 |
| Negative | 11 | ENSG00000100138 | SNU13    | 0.000381 |

|          |    |                 |           |          |
|----------|----|-----------------|-----------|----------|
| Negative | 12 | ENSG00000186591 | UBE2H     | 0.000381 |
| Negative | 13 | ENSG00000161547 | SRSF2     | 0.000381 |
| Negative | 14 | ENSG00000115875 | SRSF7     | 0.00099  |
| Negative | 15 | ENSG00000204569 | PPP1R10   | 0.00099  |
| Negative | 16 | ENSG00000171862 | PTEN      | 0.001547 |
| Negative | 17 | ENSG00000114209 | PDCD10    | 0.002038 |
| Negative | 18 | ENSG00000105618 | PRPF31    | 0.002475 |
| Negative | 19 | ENSG00000125952 | MAX       | 0.002866 |
| Negative | 20 | ENSG00000171634 | BPTF      | 0.003536 |
| Negative | 21 | ENSG00000169564 | PCBP1     | 0.003536 |
| Negative | 22 | ENSG00000135473 | PAN2      | 0.00409  |
| Negative | 23 | ENSG00000060339 | CCAR1     | 0.00409  |
| Negative | 24 | ENSG00000134884 | ARGLU1    | 0.004332 |
| Negative | 25 | ENSG00000163635 | ATXN7     | 0.004379 |
| Negative | 26 | ENSG00000135801 | TAF5L     | 0.004379 |
| Negative | 27 | ENSG00000115607 | IL18RAP   | 0.004584 |
| Negative | 28 | ENSG00000108883 | EFTUD2    | 0.007603 |
| Negative | 29 | ENSG00000139549 | DHH       | 0.008706 |
| Negative | 30 | ENSG00000086598 | TMED2     | 0.009736 |
| Negative | 31 | ENSG00000141568 | FOXK2     | 0.011019 |
| Negative | 32 | ENSG00000182591 | KRTAP11-1 | 0.011551 |
| Negative | 33 | ENSG00000172927 | MYEOV     | 0.011551 |
| Negative | 34 | ENSG00000163605 | PPP4R2    | 0.011794 |

|          |    |                 |         |          |
|----------|----|-----------------|---------|----------|
| Negative | 35 | ENSG00000175550 | DRAP1   | 0.01372  |
| Negative | 36 | ENSG00000105393 | BABAM1  | 0.015264 |
| Negative | 37 | ENSG00000198258 | UBL5    | 0.015763 |
| Negative | 38 | ENSG00000101193 | GID8    | 0.015763 |
| Negative | 39 | ENSG00000134186 | PRPF38B | 0.016882 |
| Negative | 40 | ENSG00000112110 | MRPL18  | 0.019431 |
| Negative | 41 | ENSG00000058262 | SEC61A1 | 0.023304 |
| Negative | 42 | ENSG00000174547 | MRPL11  | 0.024163 |
| Negative | 43 | ENSG00000141526 | SLC16A3 | 0.026665 |
| Negative | 44 | ENSG00000156471 | PTDSS1  | 0.026665 |
| Negative | 45 | ENSG00000173011 | TADA2B  | 0.027741 |
| Negative | 46 | ENSG00000183091 | NEB     | 0.027741 |
| Negative | 47 | ENSG00000109189 | USP46   | 0.027741 |
| Negative | 48 | ENSG00000100427 | MLC1    | 0.027741 |
| Negative | 49 | ENSG00000229549 | TSPY8   | 0.027741 |
| Negative | 50 | ENSG00000164151 | ICE1    | 0.027741 |
| Negative | 51 | ENSG00000162300 | ZFPL1   | 0.027741 |
| Negative | 52 | ENSG00000143569 | UBAP2L  | 0.027741 |
| Negative | 53 | ENSG00000167088 | SNRPD1  | 0.027741 |
| Negative | 54 | ENSG00000129562 | DAD1    | 0.028144 |
| Negative | 55 | ENSG00000172409 | CLP1    | 0.029433 |
| Negative | 56 | ENSG00000198754 | OXCT2   | 0.031206 |
| Negative | 57 | ENSG00000111859 | NEDD9   | 0.033959 |

|          |    |                 |         |          |
|----------|----|-----------------|---------|----------|
| Negative | 58 | ENSG00000136875 | PRPF4   | 0.034568 |
| Negative | 59 | ENSG00000008118 | CAMK1G  | 0.035891 |
| Negative | 60 | ENSG00000160993 | ALKBH4  | 0.035891 |
| Negative | 61 | ENSG00000185963 | BICD2   | 0.036114 |
| Negative | 62 | ENSG0000011083  | SLC6A7  | 0.037325 |
| Negative | 63 | ENSG00000196655 | TRAPPC4 | 0.037325 |
| Negative | 64 | ENSG00000172967 | XKR3    | 0.038029 |
| Negative | 65 | ENSG00000156171 | DRAM2   | 0.038029 |
| Negative | 66 | ENSG00000120948 | TARDBP  | 0.038029 |
| Negative | 67 | ENSG00000129514 | FOXA1   | 0.040607 |
| Negative | 68 | ENSG00000140534 | TICRR   | 0.040607 |
| Negative | 69 | ENSG00000074181 | NOTCH3  | 0.040607 |
| Negative | 70 | ENSG00000158966 | CACHD1  | 0.040607 |
| Negative | 71 | ENSG00000112701 | SENP6   | 0.040607 |
| Negative | 72 | ENSG00000136709 | WDR33   | 0.040607 |
| Negative | 73 | ENSG00000166189 | HPS6    | 0.040607 |
| Negative | 74 | ENSG00000102554 | KLF5    | 0.040607 |
| Negative | 75 | ENSG00000172465 | TCEAL1  | 0.043708 |
| Negative | 76 | ENSG00000134982 | APC     | 0.043708 |
| Negative | 77 | ENSG00000185278 | ZBTB37  | 0.044109 |
| Negative | 78 | ENSG00000105662 | CRTC1   | 0.044109 |
| Negative | 79 | ENSG00000092201 | SUPT16H | 0.044109 |
| Negative | 80 | ENSG00000125818 | PSMF1   | 0.044109 |

|          |     |                 |         |          |
|----------|-----|-----------------|---------|----------|
| Negative | 81  | ENSG00000103647 | CORO2B  | 0.044109 |
| Negative | 82  | ENSG00000196236 | XPNPEP3 | 0.044109 |
| Negative | 83  | ENSG00000057704 | TMCC3   | 0.044109 |
| Negative | 84  | ENSG00000182872 | RBM10   | 0.044109 |
| Negative | 85  | ENSG00000143379 | SETDB1  | 0.044109 |
| Negative | 86  | ENSG00000176909 | MAMSTR  | 0.044109 |
| Negative | 87  | ENSG00000157322 | CLEC18A | 0.044109 |
| Negative | 88  | ENSG00000182325 | FBXL6   | 0.044109 |
| Negative | 89  | ENSG00000104921 | FCER2   | 0.044109 |
| Negative | 90  | ENSG00000189253 | TRIM64B | 0.04648  |
| Negative | 91  | ENSG00000159140 | SON     | 0.047492 |
| Negative | 92  | ENSG00000176020 | AMIGO3  | 0.048913 |
| Negative | 93  | ENSG00000007866 | TEAD3   | 0.04987  |
| Negative | 94  | ENSG00000065911 | MTHFD2  | 0.04987  |
| Negative | 95  | ENSG00000131899 | LLGL1   | 0.04987  |
| Negative | 96  | ENSG00000095321 | CRAT    | 0.051337 |
| Negative | 97  | ENSG00000170255 | MRGPRX1 | 0.051337 |
| Negative | 98  | ENSG00000157110 | BPMS    | 0.051337 |
| Negative | 99  | ENSG00000160226 | C21orf2 | 0.051337 |
| Negative | 100 | ENSG00000161940 | BCL6B   | 0.051337 |
| Negative | 101 | ENSG00000185352 | HS6ST3  | 0.055632 |
| Negative | 102 | ENSG00000254709 | IGLL5   | 0.057416 |
| Negative | 103 | ENSG00000176476 | SGF29   | 0.062722 |

|          |     |                 |         |          |
|----------|-----|-----------------|---------|----------|
| Negative | 104 | ENSG00000164048 | ZNF589  | 0.064074 |
| Negative | 105 | ENSG00000143995 | MEIS1   | 0.064074 |
| Negative | 106 | ENSG00000204070 | SYS1    | 0.066365 |
| Negative | 107 | ENSG00000112983 | BRD8    | 0.069446 |
| Negative | 108 | ENSG00000102265 | TIMP1   | 0.069536 |
| Negative | 109 | ENSG00000110651 | CD81    | 0.070297 |
| Negative | 110 | ENSG00000101191 | DIDO1   | 0.070297 |
| Negative | 111 | ENSG00000145216 | FIP1L1  | 0.070297 |
| Negative | 112 | ENSG00000110063 | DCPS    | 0.070297 |
| Negative | 113 | ENSG00000164944 | VIRMA   | 0.070297 |
| Negative | 114 | ENSG00000259956 | RBM15B  | 0.070297 |
| Negative | 115 | ENSG00000179564 | LSMEM2  | 0.070297 |
| Negative | 116 | ENSG00000101104 | PABPC1L | 0.074091 |
| Negative | 117 | ENSG00000126226 | PCID2   | 0.074091 |
| Negative | 118 | ENSG00000160963 | COL26A1 | 0.074091 |
| Negative | 119 | ENSG00000176978 | DPP7    | 0.074091 |
| Negative | 120 | ENSG00000186105 | LRRC70  | 0.074413 |
| Negative | 121 | ENSG00000125449 | ARMC7   | 0.074413 |
| Negative | 122 | ENSG00000069869 | NEDD4   | 0.074413 |
| Negative | 123 | ENSG00000168906 | MAT2A   | 0.074413 |
| Negative | 124 | ENSG00000204228 | HSD17B8 | 0.074413 |
| Negative | 125 | ENSG00000244405 | ETV5    | 0.074413 |
| Negative | 126 | ENSG00000110321 | EIF4G2  | 0.074413 |

|          |     |                 |           |          |
|----------|-----|-----------------|-----------|----------|
| Negative | 127 | ENSG00000175198 | PCCA      | 0.074413 |
| Negative | 128 | ENSG00000185272 | RBM11     | 0.075688 |
| Negative | 129 | ENSG00000153113 | CAST      | 0.07702  |
| Negative | 130 | ENSG00000160310 | PRMT2     | 0.078945 |
| Negative | 131 | ENSG00000187189 | TSPYL4    | 0.078945 |
| Negative | 132 | ENSG00000075856 | SART3     | 0.078945 |
| Negative | 133 | ENSG00000106245 | BUD31     | 0.079318 |
| Negative | 134 | ENSG00000170613 | FAM71B    | 0.079318 |
| Negative | 135 | ENSG00000189319 | FAM53B    | 0.079318 |
| Negative | 136 | ENSG00000079102 | RUNX1T1   | 0.079528 |
| Negative | 137 | ENSG00000117461 | PIK3R3    | 0.079528 |
| Negative | 138 | ENSG00000185176 | AQP12B    | 0.079528 |
| Negative | 139 | ENSG00000184916 | JAG2      | 0.079528 |
| Negative | 140 | ENSG00000140691 | ARMC5     | 0.079562 |
| Negative | 141 | ENSG00000159217 | IGF2BP1   | 0.079581 |
| Negative | 142 | ENSG00000128815 | WDFY4     | 0.079581 |
| Negative | 143 | ENSG00000105829 | BET1      | 0.079581 |
| Negative | 144 | ENSG00000128951 | DUT       | 0.079581 |
| Negative | 145 | ENSG00000184678 | HIST2H2BE | 0.079581 |
| Negative | 146 | ENSG00000089818 | NECAP1    | 0.079581 |
| Negative | 147 | ENSG00000149260 | CAPN5     | 0.08376  |
| Negative | 148 | ENSG00000103326 | CAPN15    | 0.08376  |
| Negative | 149 | ENSG00000213937 | CLDN9     | 0.08376  |

|          |     |                 |           |          |
|----------|-----|-----------------|-----------|----------|
| Negative | 150 | ENSG00000187555 | USP7      | 0.083765 |
| Negative | 151 | ENSG00000047410 | TPR       | 0.083765 |
| Negative | 152 | ENSG00000135363 | LMO2      | 0.083998 |
| Negative | 153 | ENSG00000114784 | EIF1B     | 0.083998 |
| Negative | 154 | ENSG00000126752 | SSX1      | 0.083998 |
| Negative | 155 | ENSG00000103510 | KAT8      | 0.084286 |
| Negative | 156 | ENSG00000029364 | SLC39A9   | 0.086983 |
| Negative | 157 | ENSG00000134809 | TIMM10    | 0.088699 |
| Negative | 158 | ENSG00000236334 | PPIAL4G   | 0.089139 |
| Negative | 159 | ENSG00000135045 | C9orf40   | 0.089139 |
| Negative | 160 | ENSG00000198133 | TMEM229B  | 0.089139 |
| Negative | 161 | ENSG00000215704 | CELA2B    | 0.089139 |
| Negative | 162 | ENSG00000061987 | MON2      | 0.089139 |
| Negative | 163 | ENSG00000177732 | SOX12     | 0.089139 |
| Negative | 164 | ENSG00000186086 | NBPF6     | 0.090226 |
| Negative | 165 | ENSG00000104731 | KLHDC4    | 0.092185 |
| Negative | 166 | ENSG00000172888 | ZNF621    | 0.092185 |
| Negative | 167 | ENSG00000011485 | PPP5C     | 0.092185 |
| Negative | 168 | ENSG00000109101 | FOXN1     | 0.092185 |
| Negative | 169 | ENSG00000134453 | RBM17     | 0.092185 |
| Negative | 170 | ENSG00000177519 | RPRM      | 0.092691 |
| Negative | 171 | ENSG00000100218 | RSPH14    | 0.092901 |
| Negative | 172 | ENSG00000196890 | HIST3H2BB | 0.093858 |

|          |     |                 |         |          |
|----------|-----|-----------------|---------|----------|
| Negative | 173 | ENSG00000136541 | ERMN    | 0.095433 |
| Negative | 174 | ENSG00000161800 | RACGAP1 | 0.099409 |
| Negative | 175 | ENSG00000101412 | E2F1    | 0.099409 |
| Negative | 176 | ENSG00000111906 | HDDC2   | 0.099409 |
| Negative | 177 | ENSG00000196666 | FAM180B | 0.099409 |
| Negative | 178 | ENSG00000164091 | WDR82   | 0.099409 |
| Negative | 179 | ENSG00000184863 | RBM33   | 0.099409 |
| Negative | 180 | ENSG00000100320 | RBFOX2  | 0.099409 |
| Negative | 181 | ENSG00000168484 | SFTPC   | 0.099409 |
| Negative | 182 | ENSG00000143493 | INTS7   | 0.099409 |
| Negative | 183 | ENSG00000235194 | PPP1R3E | 0.099409 |
| Negative | 184 | ENSG00000082438 | COBLL1  | 0.099409 |
| Negative | 185 | ENSG00000137601 | NEK1    | 0.099409 |
| Negative | 186 | ENSG00000176571 | CNBD1   | 0.099409 |

**Appendix Table S3** A complete list of significant Gene Ontology (GO) terms of RBM3 positive and negative regulators

| Positive/Negative regulator | GO           | Category                | Description                                                       | LogP   | Hits                     |
|-----------------------------|--------------|-------------------------|-------------------------------------------------------------------|--------|--------------------------|
| Positive                    | GO:0022618   | GO Biological Processes | ribonucleoprotein complex assembly                                | -5.602 | EIF3B EIF3G PUF60 LUC7L3 |
| Positive                    | GO:0071826   | GO Biological Processes | ribonucleoprotein complex subunit organization                    | -5.540 | EIF3B EIF3G PUF60 LUC7L3 |
| Positive                    | R-HSA-72689  | Reactome Gene Sets      | Formation of a pool of free 40S subunits                          | -4.890 | RPLP2 EIF3B EIF3G        |
| Positive                    | R-HSA-156827 | Reactome Gene Sets      | L13a-mediated translational silencing of Ceruloplasmin expression | -4.767 | RPLP2 EIF3B EIF3G        |

|                 |                   |                                |                                                                                      |               |                                     |
|-----------------|-------------------|--------------------------------|--------------------------------------------------------------------------------------|---------------|-------------------------------------|
| Positive        | R-HSA-72706       | Reactome Gene Sets             | GTP hydrolysis and joining of the 60S ribosomal subunit                              | -4.756        | RPLP2 EIF3B EIF3G                   |
| Positive        | R-HSA-72613       | Reactome Gene Sets             | Eukaryotic Translation Initiation                                                    | -4.677        | RPLP2 EIF3B EIF3G                   |
| Positive        | R-HSA-72737       | Reactome Gene Sets             | Cap-dependent Translation Initiation                                                 | -4.677        | RPLP2 EIF3B EIF3G                   |
| Positive        | GO:0002181        | GO Biological Processes        | cytoplasmic translation                                                              | -4.645        | RPLP2 EIF3B EIF3G                   |
| Positive        | GO:0022613        | GO Biological Processes        | ribonucleoprotein complex biogenesis                                                 | -4.338        | EIF3B EIF3G PUF60 LUC7L3            |
| Positive        | R-HSA-72766       | Reactome Gene Sets             | Translation                                                                          | -3.526        | RPLP2 EIF3B EIF3G                   |
| Positive        | GO:0006412        | GO Biological Processes        | translation                                                                          | -3.225        | RPLP2 EIF3B EIF3G                   |
| Positive        | GO:0043043        | GO Biological Processes        | peptide biosynthetic process                                                         | -3.136        | RPLP2 EIF3B EIF3G                   |
| Positive        | GO:0043604        | GO Biological Processes        | amide biosynthetic process                                                           | -2.816        | RPLP2 EIF3B EIF3G                   |
| Positive        | GO:0006518        | GO Biological Processes        | peptide metabolic process                                                            | -2.773        | RPLP2 EIF3B EIF3G                   |
| Positive        | GO:0034645        | GO Biological Processes        | cellular macromolecule biosynthetic process                                          | -2.346        | RPLP2 EIF3B EIF3G                   |
| Positive        | GO:0043603        | GO Biological Processes        | cellular amide metabolic process                                                     | -2.278        | RPLP2 EIF3B EIF3G                   |
| Positive        | GO:0000377        | GO Biological Processes        | RNA splicing, via transesterification reactions with bulged adenosine as nucleophile | -5.247        | HNRNPH1 SNRNP70 PUF60 LUC7L3        |
| <b>Positive</b> | <b>GO:0000398</b> | <b>GO Biological Processes</b> | <b>mRNA splicing, via spliceosome</b>                                                | <b>-5.247</b> | <b>HNRNPH1 SNRNP70 PUF60 LUC7L3</b> |
| Positive        | GO:0000375        | GO Biological Processes        | RNA splicing, via transesterification reactions                                      | -5.222        | HNRNPH1 SNRNP70 PUF60 LUC7L3        |
| Positive        | GO:0016071        | GO Biological Processes        | mRNA metabolic process                                                               | -5.220        | HNRNPH1 SNRNP70 TAF4 PUF60 LUC7L3   |
| Positive        | GO:0008380        | GO Biological Processes        | RNA splicing                                                                         | -4.620        | HNRNPH1 SNRNP70 PUF60 LUC7L3        |
| Positive        | CORUM:351         | CORUM                          | Spliceosome                                                                          | -4.457        | SNRNP70 PUF60 LUC7L3                |
| Positive        | GO:0006397        | GO Biological Processes        | mRNA processing                                                                      | -4.319        | HNRNPH1 SNRNP70 PUF60 LUC7L3        |
| Positive        | GO:0043484        | GO Biological Processes        | regulation of RNA splicing                                                           | -4.156        | HNRNPH1 SNRNP70 PUF60               |
| Positive        | R-HSA-72163       | Reactome Gene Sets             | mRNA Splicing - Major Pathway                                                        | -4.113        | HNRNPH1 SNRNP70 PUF60               |
| Positive        | R-HSA-72172       | Reactome Gene Sets             | mRNA Splicing                                                                        | -4.058        | HNRNPH1 SNRNP70 PUF60               |
| Positive        | R-HSA-72203       | Reactome Gene Sets             | Processing of Capped Intron-Containing Pre-mRNA                                      | -3.745        | HNRNPH1 SNRNP70 PUF60               |
| Positive        | R-HSA-8953854     | Reactome Gene Sets             | Metabolism of RNA                                                                    | -3.686        | HNRNPH1 RPLP2 SNRNP70 PUF60         |
| Positive        | GO:0042176        | GO Biological Processes        | regulation of protein catabolic process                                              | -3.133        | ADAM8 SNRNP70 HUWE1                 |
| Positive        | GO:0051223        | GO Biological Processes        | regulation of protein transport                                                      | -2.856        | ADAM8 KLF7 HUWE1                    |
| Positive        | GO:0070201        | GO Biological Processes        | regulation of establishment of protein localization                                  | -2.795        | ADAM8 KLF7 HUWE1                    |

|                 |                   |                                |                                                                                      |                |                                                                                                                        |
|-----------------|-------------------|--------------------------------|--------------------------------------------------------------------------------------|----------------|------------------------------------------------------------------------------------------------------------------------|
| Negative        | GO:0006397        | GO Biological Processes        | mRNA processing                                                                      | -16.709        | SNU13 SRSF2 SRSF7 SNRPD1 SON RBM10 PRPF4 EFTUD2 WTAP PAN2 CLP1 ECD TARDBP PRPF31 HTATS1 PRPF38B SMU1 WDR33 UBL5 PPP4R2 |
| <b>Negative</b> | <b>GO:0008380</b> | <b>GO Biological Processes</b> | <b>RNA splicing</b>                                                                  | <b>-15.577</b> | <b>SNU13 SRSF2 SRSF7 SNRPD1 SON RBM10 PRPF4 EFTUD2 WTAP CLP1 ECD TARDBP PRPF31 HTATS1 PRPF38B SMU1 UBL5 PPP4R2</b>     |
| Negative        | GO:0016071        | GO Biological Processes        | mRNA metabolic process                                                               | -14.312        | SNU13 SRSF2 SRSF7 SNRPD1 SON RBM10 PRPF4 EFTUD2 WTAP PAN2 CLP1 ECD TARDBP PRPF31 HTATS1 PRPF38B SMU1 WDR33 UBL5 PPP4R2 |
| Negative        | R-HSA-72163       | Reactome Gene Sets             | mRNA Splicing - Major Pathway                                                        | -10.798        | SNU13 PCBP1 SRSF2 SRSF7 SNRPD1 PRPF4 EFTUD2 CLP1 PRPF31 WDR33 CCAR1                                                    |
| Negative        | R-HSA-72203       | Reactome Gene Sets             | Processing of Capped Intron-Containing Pre-mRNA                                      | -10.728        | SNU13 PCBP1 SRSF2 SRSF7 SNRPD1 PRPF4 EFTUD2 WTAP CLP1 PRPF31 WDR33 CCAR1                                               |
| Negative        | R-HSA-72172       | Reactome Gene Sets             | mRNA Splicing                                                                        | -10.598        | SNU13 PCBP1 SRSF2 SRSF7 SNRPD1 PRPF4 EFTUD2 CLP1 PRPF31 WDR33 CCAR1                                                    |
| Negative        | CORUM:351         | CORUM                          | Spliceosome                                                                          | -10.590        | SNU13 SRSF2 SRSF7 SNRPD1 PRPF4 EFTUD2 WTAP PRPF31 HTATS1 SMU1                                                          |
| Negative        | GO:0000377        | GO Biological Processes        | RNA splicing, via transesterification reactions with bulged adenosine as nucleophile | -9.053         | SNU13 SRSF2 SRSF7 SNRPD1 RBM10 PRPF4 EFTUD2 PRPF31 HTATS1 SMU1 UBL5                                                    |
| Negative        | GO:0000398        | GO Biological Processes        | mRNA splicing, via spliceosome                                                       | -9.053         | SNU13 SRSF2 SRSF7 SNRPD1 RBM10 PRPF4 EFTUD2 PRPF31 HTATS1 SMU1 UBL5                                                    |
| Negative        | hsa03040          | KEGG Pathway                   | Spliceosome                                                                          | -9.006         | SNU13 PCBP1 SRSF2 SRSF7 SNRPD1 PRPF4 EFTUD2 PRPF31 PRPF38B                                                             |
| Negative        | GO:0000375        | GO Biological Processes        | RNA splicing, via transesterification reactions                                      | -8.985         | SNU13 SRSF2 SRSF7 SNRPD1 RBM10 PRPF4 EFTUD2 PRPF31 HTATS1 SMU1 UBL5                                                    |
| Negative        | R-HSA-8953854     | Reactome Gene Sets             | Metabolism of RNA                                                                    | -7.589         | SNU13 PCBP1 SRSF2 SRSF7 SNRPD1 PRPF4 EFTUD2 PSMF1 WTAP PAN2 CLP1 PRPF31 WDR33 CCAR1                                    |
| Negative        | WP411             | WikiPathways                   | mRNA processing                                                                      | -6.659         | SNU13 SRSF2 SRSF7 SNRPD1 PRPF4 EFTUD2 CLP1                                                                             |
| Negative        | R-HSA-72165       | Reactome Gene Sets             | mRNA Splicing - Minor Pathway                                                        | -6.193         | SNU13 SRSF2 SRSF7 SNRPD1 EFTUD2                                                                                        |
| Negative        | GO:0022618        | GO Biological Processes        | ribonucleoprotein complex assembly                                                   | -2.298         | SNU13 SNRPD1 CLP1 PRPF31                                                                                               |
| Negative        | GO:0071826        | GO Biological Processes        | ribonucleoprotein complex subunit organization                                       | -2.243         | SNU13 SNRPD1 CLP1 PRPF31                                                                                               |
| Negative        | GO:0043484        | GO Biological Processes        | regulation of RNA splicing                                                           | -8.273         | ATXN7 SRSF2 SRSF7 SON RBM10 WTAP TAF5L SMU1 TADA2B                                                                     |
| Negative        | GO:0048024        | GO Biological Processes        | regulation of mRNA splicing, via spliceosome                                         | -5.961         | SRSF2 SRSF7 SON RBM10 WTAP SMU1                                                                                        |
| Negative        | GO:1903311        | GO Biological Processes        | regulation of mRNA metabolic process                                                 | -5.251         | SRSF2 SRSF7 SON RBM10 WTAP PAN2 TARDBP SMU1                                                                            |
| Negative        | GO:0050684        | GO Biological Processes        | regulation of mRNA processing                                                        | -5.223         | SRSF2 SRSF7 SON RBM10 WTAP SMU1                                                                                        |
| Negative        | GO:0000381        | GO Biological Processes        | regulation of alternative mRNA splicing, via spliceosome                             | -4.407         | SRSF2 RBM10 WTAP SMU1                                                                                                  |
| Negative        | WP4352            | WikiPathways                   | Ciliary landscape                                                                    | -5.210         | APC UBE2H EFTUD2 YPEL5 GID8 XPNPEP3 WDR26                                                                              |

|                 |                      |                                |                                                                          |               |                                                                        |
|-----------------|----------------------|--------------------------------|--------------------------------------------------------------------------|---------------|------------------------------------------------------------------------|
| <b>Negative</b> | <b>GO:0043161</b>    | <b>GO Biological Processes</b> | <b>proteasome-mediated ubiquitin-dependent protein catabolic process</b> | <b>-3.170</b> | <b>APC UBE2H PSMF1 FBXL6 GID8 WDR26</b>                                |
| Negative        | GO:0010498           | GO Biological Processes        | proteasomal protein catabolic process                                    | -2.971        | APC UBE2H PSMF1 FBXL6 GID8 WDR26                                       |
| Negative        | GO:0006511           | GO Biological Processes        | ubiquitin-dependent protein catabolic process                            | -2.719        | APC UBE2H PSMF1 FBXL6 GID8 USP46 WDR26                                 |
| Negative        | GO:0019941           | GO Biological Processes        | modification-dependent protein catabolic process                         | -2.676        | APC UBE2H PSMF1 FBXL6 GID8 USP46 WDR26                                 |
| Negative        | GO:0043632           | GO Biological Processes        | modification-dependent macromolecule catabolic process                   | -2.629        | APC UBE2H PSMF1 FBXL6 GID8 USP46 WDR26                                 |
| Negative        | GO:0051603           | GO Biological Processes        | proteolysis involved in cellular protein catabolic process               | -2.434        | APC UBE2H PSMF1 FBXL6 GID8 USP46 WDR26                                 |
| Negative        | GO:0044257           | GO Biological Processes        | cellular protein catabolic process                                       | -2.328        | APC UBE2H PSMF1 FBXL6 GID8 USP46 WDR26                                 |
| Negative        | GO:0030163           | GO Biological Processes        | protein catabolic process                                                | -2.142        | APC UBE2H PSMF1 FBXL6 GID8 USP46 WDR26                                 |
| Negative        | GO:0016578           | GO Biological Processes        | histone deubiquitination                                                 | -4.946        | ATXN7 TAF5L BABAM1 TADA2B                                              |
| Negative        | GO:0070646           | GO Biological Processes        | protein modification by small protein removal                            | -4.820        | ATXN7 SEN6 TAF5L BABAM1 USP46 TADA2B                                   |
| Negative        | GO:0080135           | GO Biological Processes        | regulation of cellular response to stress                                | -4.762        | PPP1R10 PTEN ATXN7 TSC1 CORO2B TMED2 PDCD10 TAF5L BABAM1 TADA2B PPP4R2 |
| Negative        | CORUM:6664           | CORUM                          | STAGA complex, SPT3-linked                                               | -4.550        | ATXN7 TAF5L TADA2B                                                     |
| <b>Negative</b> | <b>R-HSA-5688426</b> | <b>Reactome Gene Sets</b>      | <b>Deubiquitination</b>                                                  | <b>-4.350</b> | <b>APC FOXK2 PTEN ATXN7 PSMF1 BABAM1 TADA2B</b>                        |
| Negative        | GO:0035521           | GO Biological Processes        | monoubiquitinated histone deubiquitination                               | -3.984        | ATXN7 TAF5L TADA2B                                                     |
| Negative        | GO:0035522           | GO Biological Processes        | monoubiquitinated histone H2A deubiquitination                           | -3.984        | ATXN7 TAF5L TADA2B                                                     |
| Negative        | GO:0016579           | GO Biological Processes        | protein deubiquitination                                                 | -3.955        | ATXN7 TAF5L BABAM1 USP46 TADA2B                                        |
| Negative        | GO:0035520           | GO Biological Processes        | monoubiquitinated protein deubiquitination                               | -3.774        | ATXN7 TAF5L TADA2B                                                     |
| Negative        | GO:2001020           | GO Biological Processes        | regulation of response to DNA damage stimulus                            | -3.368        | PPP1R10 ATXN7 TAF5L BABAM1 TADA2B PPP4R2                               |
| Negative        | GO:0006282           | GO Biological Processes        | regulation of DNA repair                                                 | -3.267        | ATXN7 TAF5L BABAM1 TADA2B PPP4R2                                       |
| Negative        | GO:0043966           | GO Biological Processes        | histone H3 acetylation                                                   | -3.022        | ATXN7 TAF5L TADA2B                                                     |
| Negative        | GO:0051052           | GO Biological Processes        | regulation of DNA metabolic process                                      | -2.809        | PPP1R10 ATXN7 TAF5L BABAM1 TICRR TADA2B PPP4R2                         |
| Negative        | GO:0016570           | GO Biological Processes        | histone modification                                                     | -2.775        | ATXN7 SETDB1 TAF5L BABAM1 TADA2B PPP4R2                                |
| Negative        | GO:0018205           | GO Biological Processes        | peptidyl-lysine modification                                             | -2.545        | ATXN7 SETDB1 SEN6 TAF5L TADA2B                                         |
| Negative        | R-HSA-5689880        | Reactome Gene Sets             | Ub-specific processing proteases                                         | -2.284        | PTEN ATXN7 PSMF1 TADA2B                                                |
| Negative        | GO:0016573           | GO Biological Processes        | histone acetylation                                                      | -2.178        | ATXN7 TAF5L TADA2B                                                     |
| Negative        | GO:0018393           | GO Biological Processes        | internal peptidyl-lysine acetylation                                     | -2.120        | ATXN7 TAF5L TADA2B                                                     |

|          |             |                         |                                                              |        |                                                |
|----------|-------------|-------------------------|--------------------------------------------------------------|--------|------------------------------------------------|
| Negative | GO:0006475  | GO Biological Processes | internal protein amino acid acetylation                      | -2.101 | ATXN7 TAF5L TADA2B                             |
| Negative | GO:0018394  | GO Biological Processes | peptidyl-lysine acetylation                                  | -2.092 | ATXN7 TAF5L TADA2B                             |
| Negative | R-HSA-72187 | Reactome Gene Sets      | mRNA 3'-end processing                                       | -4.436 | SRSF2 SRSF7 CLP1 WDR33                         |
| Negative | R-HSA-73856 | Reactome Gene Sets      | RNA Polymerase II Transcription Termination                  | -4.193 | SRSF2 SRSF7 CLP1 WDR33                         |
| Negative | R-HSA-72202 | Reactome Gene Sets      | Transport of Mature Transcript to Cytoplasm                  | -2.622 | SRSF2 SRSF7 WDR33                              |
| Negative | hsa03015    | KEGG Pathway            | mRNA surveillance pathway                                    | -2.445 | CLP1 TARDBP WDR33                              |
| Negative | GO:0050657  | GO Biological Processes | nucleic acid transport                                       | -3.823 | KPNB1 SRSF7 TSC1 BICD2 MRPL18                  |
| Negative | GO:0050658  | GO Biological Processes | RNA transport                                                | -3.823 | KPNB1 SRSF7 TSC1 BICD2 MRPL18                  |
| Negative | GO:0051236  | GO Biological Processes | establishment of RNA localization                            | -3.798 | KPNB1 SRSF7 TSC1 BICD2 MRPL18                  |
| Negative | GO:0006403  | GO Biological Processes | RNA localization                                             | -3.595 | KPNB1 SRSF7 TSC1 BICD2 MRPL18                  |
| Negative | GO:0015931  | GO Biological Processes | nucleobase-containing compound transport                     | -3.221 | KPNB1 SRSF7 TSC1 BICD2 MRPL18                  |
| Negative | GO:0032388  | GO Biological Processes | positive regulation of intracellular transport               | -3.383 | PDCD10 MLC1 ICE1 TARDBP UBL5                   |
| Negative | GO:0090316  | GO Biological Processes | positive regulation of intracellular protein transport       | -2.820 | PDCD10 ICE1 TARDBP UBL5                        |
| Negative | GO:1903829  | GO Biological Processes | positive regulation of protein localization                  | -2.530 | APC CORO2B PDCD10 ICE1 TARDBP UBL5             |
| Negative | GO:1904951  | GO Biological Processes | positive regulation of establishment of protein localization | -2.527 | CORO2B PDCD10 ICE1 TARDBP UBL5                 |
| Negative | GO:0032386  | GO Biological Processes | regulation of intracellular transport                        | -2.395 | PDCD10 MLC1 ICE1 TARDBP UBL5                   |
| Negative | GO:0033157  | GO Biological Processes | regulation of intracellular protein transport                | -2.256 | PDCD10 ICE1 TARDBP UBL5                        |
| Negative | GO:0070201  | GO Biological Processes | regulation of establishment of protein localization          | -2.218 | LLGL1 CORO2B PDCD10 ICE1 TARDBP UBL5           |
| Negative | GO:0060341  | GO Biological Processes | regulation of cellular localization                          | -2.073 | APC PTEN PDCD10 MLC1 ICE1 TARDBP UBL5          |
| Negative | GO:0001655  | GO Biological Processes | urogenital system development                                | -3.176 | FOXA1 NOTCH3 PTEN SOX11 TSC1 SEC61A1           |
| Negative | GO:0035239  | GO Biological Processes | tube morphogenesis                                           | -2.929 | KLF5 FOXA1 NOTCH3 PTEN SOX11 TSC1 TMED2 PDCD10 |
| Negative | GO:0021915  | GO Biological Processes | neural tube development                                      | -2.851 | FOXA1 SOX11 TSC1 TMED2                         |
| Negative | GO:0002065  | GO Biological Processes | columnar/cuboidal epithelial cell differentiation            | -2.682 | KLF5 FOXA1 SOX11                               |
| Negative | GO:0060537  | GO Biological Processes | muscle tissue development                                    | -2.527 | KLF5 NEB PTEN SOX11 TSC1                       |
| Negative | GO:0001841  | GO Biological Processes | neural tube formation                                        | -2.372 | SOX11 TSC1 TMED2                               |
| Negative | GO:0001838  | GO Biological Processes | embryonic epithelial tube formation                          | -2.168 | SOX11 TSC1 TMED2                               |
| Negative | GO:0072175  | GO Biological Processes | epithelial tube formation                                    | -2.092 | SOX11 TSC1 TMED2                               |

|          |            |                         |                                                                  |        |                                                      |
|----------|------------|-------------------------|------------------------------------------------------------------|--------|------------------------------------------------------|
| Negative | GO:0006325 | GO Biological Processes | chromatin organization                                           | -3.152 | BPTF FOXA1 SETDB1 SUPT16H BABAM1 ALKBH4 TADA2B TSPY8 |
| Negative | GO:0048608 | GO Biological Processes | reproductive structure development                               | -2.653 | BPTF FOXA1 PTEN TMED2 DHH TSPY8                      |
| Negative | GO:0061458 | GO Biological Processes | reproductive system development                                  | -2.638 | BPTF FOXA1 PTEN TMED2 DHH TSPY8                      |
| Negative | GO:0006338 | GO Biological Processes | chromatin remodeling                                             | -2.601 | BPTF FOXA1 SUPT16H TADA2B TSPY8                      |
| Negative | M145       | Canonical Pathways      | PID P53 DOWNSTREAM PATHWAY                                       | -3.028 | APC FOXA1 PTEN TADA2B                                |
| Negative | GO:0045165 | GO Biological Processes | cell fate commitment                                             | -2.974 | APC FOXA1 NOTCH3 TEAD3 DHH                           |
| Negative | WP2853     | WikiPathways            | Endoderm differentiation                                         | -2.926 | APC BPTF FOXA1 CRTC1                                 |
| Negative | GO:0001708 | GO Biological Processes | cell fate specification                                          | -2.622 | APC FOXA1 DHH                                        |
| Negative | GO:0043068 | GO Biological Processes | positive regulation of programmed cell death                     | -2.129 | APC FCER2 FOXA1 PTEN RBM10 CCAR1                     |
| Negative | GO:0051091 | GO Biological Processes | positive regulation of DNA-binding transcription factor activity | -2.005 | FOXA1 PTEN IL18RAP CRTC1                             |
| Negative | GO:0051640 | GO Biological Processes | organelle localization                                           | -2.986 | KPNB1 LLGL1 TMED2 PDCD10 BICD2 TRAPPC4 HPS6          |
| Negative | GO:0051656 | GO Biological Processes | establishment of organelle localization                          | -2.923 | KPNB1 LLGL1 TMED2 PDCD10 BICD2 TRAPPC4               |
| Negative | GO:0007346 | GO Biological Processes | regulation of mitotic cell cycle                                 | -2.903 | APC FOXA1 PPP1R10 PTEN ECD BABAM1 TICRR              |
| Negative | GO:0010948 | GO Biological Processes | negative regulation of cell cycle process                        | -2.665 | APC PPP1R10 PTEN BABAM1 TICRR                        |
| Negative | GO:1901991 | GO Biological Processes | negative regulation of mitotic cell cycle phase transition       | -2.611 | APC PTEN BABAM1 TICRR                                |
| Negative | GO:0000278 | GO Biological Processes | mitotic cell cycle                                               | -2.519 | APC KPNB1 SRSF2 SON FBXL6 BABAM1 TICRR               |
| Negative | GO:1901987 | GO Biological Processes | regulation of cell cycle phase transition                        | -2.502 | APC PPP1R10 PTEN ECD BABAM1 TICRR                    |
| Negative | GO:1901990 | GO Biological Processes | regulation of mitotic cell cycle phase transition                | -2.273 | APC PTEN ECD BABAM1 TICRR                            |
| Negative | GO:1903047 | GO Biological Processes | mitotic cell cycle process                                       | -2.241 | APC KPNB1 SON FBXL6 BABAM1 TICRR                     |
| Negative | GO:0045930 | GO Biological Processes | negative regulation of mitotic cell cycle                        | -2.236 | APC PTEN BABAM1 TICRR                                |
| Negative | GO:0045786 | GO Biological Processes | negative regulation of cell cycle                                | -2.174 | APC PPP1R10 PTEN BABAM1 TICRR                        |
| Negative | GO:1901988 | GO Biological Processes | negative regulation of cell cycle phase transition               | -2.165 | APC PTEN BABAM1 TICRR                                |
| Negative | GO:0007093 | GO Biological Processes | mitotic cell cycle checkpoint signaling                          | -2.158 | APC BABAM1 TICRR                                     |
| Negative | GO:0010564 | GO Biological Processes | regulation of cell cycle process                                 | -2.070 | APC PPP1R10 PTEN ECD SEN6 BABAM1 TICRR               |
| Negative | GO:0070507 | GO Biological Processes | regulation of microtubule cytoskeleton organization              | -2.840 | APC ATXN7 BICD2 SEN6                                 |
| Negative | GO:0051493 | GO Biological Processes | regulation of cytoskeleton organization                          | -2.837 | APC NEB ATXN7 TSC1 CORO2B BICD2 SEN6                 |

|          |              |                         |                                                      |        |                                       |
|----------|--------------|-------------------------|------------------------------------------------------|--------|---------------------------------------|
| Negative | GO:0032886   | GO Biological Processes | regulation of microtubule-based process              | -2.091 | APC ATXN7 BICD2 SENP6                 |
| Negative | GO:0033044   | GO Biological Processes | regulation of chromosome organization                | -2.091 | APC PPP1R10 SETDB1 SENP6              |
| Negative | GO:0031330   | GO Biological Processes | negative regulation of cellular catabolic process    | -2.788 | FOXK2 TSC1 RBM10 PSMF1 TARDBP         |
| Negative | GO:1903312   | GO Biological Processes | negative regulation of mRNA metabolic process        | -2.483 | SRSF7 RBM10 TARDBP                    |
| Negative | GO:0009895   | GO Biological Processes | negative regulation of catabolic process             | -2.417 | FOXK2 TSC1 RBM10 PSMF1 TARDBP         |
| Negative | WP4949       | WikiPathways            | 16p11.2 proximal deletion syndrome                   | -2.746 | BPTF PTEN PPP4R2                      |
| Negative | GO:0031647   | GO Biological Processes | regulation of protein stability                      | -2.457 | DAD1 PTEN TSC1 PDCD10 TARDBP          |
| Negative | GO:0001933   | GO Biological Processes | negative regulation of protein phosphorylation       | -2.351 | APC PTEN TMED2 TARDBP PPP4R2          |
| Negative | GO:0010256   | GO Biological Processes | endomembrane system organization                     | -2.156 | PTEN TMED2 PDCD10 TARDBP SEC61A1 HPS6 |
| Negative | GO:0042326   | GO Biological Processes | negative regulation of phosphorylation               | -2.141 | APC PTEN TMED2 TARDBP PPP4R2          |
| Negative | WP5087       | WikiPathways            | Malignant pleural mesothelioma                       | -2.535 | APC MAX PTEN TEAD3 TSC1 SETDB1        |
| Negative | hsa05165     | KEGG Pathway            | Human papillomavirus infection                       | -2.400 | APC LLGL1 NOTCH3 PTEN TSC1            |
| Negative | GO:0042552   | GO Biological Processes | myelination                                          | -2.303 | PTEN TSC1 DHH                         |
| Negative | GO:0010810   | GO Biological Processes | regulation of cell-substrate adhesion                | -2.298 | NEDD9 PTEN TSC1 CORO2B                |
| Negative | GO:0007272   | GO Biological Processes | ensheathment of neurons                              | -2.281 | PTEN TSC1 DHH                         |
| Negative | GO:0008366   | GO Biological Processes | axon ensheathment                                    | -2.281 | PTEN TSC1 DHH                         |
| Negative | GO:0030534   | GO Biological Processes | adult behavior                                       | -2.039 | PTEN TSC1 USP46                       |
| Negative | GO:0010977   | GO Biological Processes | negative regulation of neuron projection development | -2.030 | PTEN TSC1 AMIGO3                      |
| Negative | GO:1990830   | GO Biological Processes | cellular response to leukemia inhibitory factor      | -2.420 | KLF5 SRSF7 PDCD10                     |
| Negative | GO:1990823   | GO Biological Processes | response to leukemia inhibitory factor               | -2.408 | KLF5 SRSF7 PDCD10                     |
| Negative | GO:0061640   | GO Biological Processes | cytoskeleton-dependent cytokinesis                   | -2.337 | APC SON ALKBH4                        |
| Negative | GO:0000910   | GO Biological Processes | cytokinesis                                          | -2.314 | APC SON ALKBH4                        |
| Negative | GO:0051301   | GO Biological Processes | cell division                                        | -2.286 | APC NEDD9 SON TEAD3 BABAM1 ALKBH4     |
| Negative | GO:0044089   | GO Biological Processes | positive regulation of cellular component biogenesis | -2.332 | APC TSC1 SETDB1 PAN2 ICE1 AMIGO3      |
| Negative | GO:0017148   | GO Biological Processes | negative regulation of translation                   | -2.140 | ILF3 TSC1 PAN2 TARDBP                 |
| Negative | GO:0042752   | GO Biological Processes | regulation of circadian rhythm                       | -2.208 | CRTC1 TARDBP FBXL6                    |
| Negative | R-HSA-157118 | Reactome Gene Sets      | Signaling by NOTCH                                   | -2.177 | FCER2 NOTCH3 PSMF1 TMED2              |

|          |            |                         |                                    |        |                          |
|----------|------------|-------------------------|------------------------------------|--------|--------------------------|
| Negative | GO:0006366 | GO Biological Processes | transcription by RNA polymerase II | -2.127 | DRAP1 SUPT16H ICE1 TAF5L |
|----------|------------|-------------------------|------------------------------------|--------|--------------------------|

**Appendix Table S4** sgRNA sequences used in arrayed target validation

| Gene ID              | Gene symbol   | Sequence (5' -> 3')  |
|----------------------|---------------|----------------------|
| NonTargetingGuide001 | Non-Targeting | CTTATAGCGGCCTTAGCTCA |
| NonTargetingGuide002 | Non-Targeting | CAACCTTATAGCCCCGGACT |
| NonTargetingGuide003 | Non-Targeting | CATGTAGCAGAAGGCGGCTA |
| ENSG00000169045      | HNRNPH1       | TTGGCCGTGTCAGGACTATT |
| ENSG00000169045      | HNRNPH1       | AATGTCTGATCACAGATACG |
| ENSG00000169045      | HNRNPH1       | AGCAAACCAGTCCAGCTACG |
| ENSG00000102317      | RBM3          | GGATGGTCGTCAGATCCGTG |
| ENSG00000102317      | RBM3          | GGTGGTTATGACCGCTACTC |
| ENSG00000102317      | RBM3          | CATGAGAGCCATGAACGGAG |
| ENSG00000064419      | TNPO3         | CCTGCCGGATCTGTAACAAC |
| ENSG00000064419      | TNPO3         | TAGCAATGAGTCCCGTAAAG |
| ENSG00000064419      | TNPO3         | TTGGGAAGTTGGTTTAACTT |
| ENSG00000132424      | PNISR         | CCAATGCAGCCCAATCAATC |
| ENSG00000132424      | PNISR         | CCCCTGCAAAATTATCGGG  |
| ENSG00000132424      | PNISR         | GGTGGCATCCATGGCTGATC |
| ENSG00000086758      | HUWE1         | GGACCGCTTCGATGGAATAC |
| ENSG00000086758      | HUWE1         | CAGCACCCTTGCATATCAG  |

|                 |         |                        |
|-----------------|---------|------------------------|
| ENSG00000104852 | SNRNP70 | TACGGCGCAATGCCACAATA   |
| ENSG00000104852 | SNRNP70 | AGGTATGGAATAGGGTCACG   |
| ENSG00000104852 | SNRNP70 | TGAGCATTGGGATCATTGTG   |
| ENSG00000179950 | PUF60   | ATGCTCTTGATGGGGCCAAA   |
| ENSG00000179950 | PUF60   | GGGGACCTCATACTCCACGA   |
| ENSG00000179950 | PUF60   | CAGATGAACTCGGTGATGCT   |
| ENSG00000118263 | KLF7    | GCAGCAGGGGGTCTAAGCGA   |
| ENSG00000118263 | KLF7    | GAAGCCTTATAAGTGCTCAT   |
| ENSG00000118263 | KLF7    | ACCTACAGACGGAGCCCCGG   |
| ENSG00000130699 | TAF4    | AACACCTATCATTGCACGGC   |
| ENSG00000130699 | TAF4    | GAGCGCTGCAGGGTTGCACT   |
| ENSG00000130699 | TAF4    | CTCCTCAGCGCACGGTACCA   |
| ENSG00000130811 | EIF3G   | TCCACCTGGTCGGCCCAACT   |
| ENSG00000130811 | EIF3G   | TCACCAGCGAGCTCCTCAAG   |
| ENSG00000130811 | EIF3G   | GTTTCCGTTGATGACCTCCT   |
| ENSG00000177600 | RPLP2   | CGTCCACATCAACTCACCT    |
| ENSG00000177600 | RPLP2   | TACCTGCTGGCTGCCCTAGG   |
| ENSG00000177600 | RPLP2   | CTTGGACAGCGTGGGTATCG   |
| ENSG00000106263 | EIF3B   | TGTACTIONAAAGATCGGCCCC |
| ENSG00000106263 | EIF3B   | ATTCCGGGTCAACCTCTTTA   |
| ENSG00000106263 | EIF3B   | CTTGTCAAGCTTGTAGCCGT   |
| ENSG00000141867 | BRD4    | GATTTCTCAATCTCGTCCCA   |
| ENSG00000141867 | BRD4    | ATTAACACGCCTATGGATAT   |

|                 |        |                        |
|-----------------|--------|------------------------|
| ENSG00000108848 | LUC7L3 | GTAGAACGTAGGATCAGACG   |
| ENSG00000108848 | LUC7L3 | TTGATGGGAAAACAACACAT   |
| ENSG00000108848 | LUC7L3 | TAGTAGGAGATGCCAGTCC    |
| ENSG00000151651 | ADAM8  | GAGAGGGTGAGCTACGTCCT   |
| ENSG00000151651 | ADAM8  | CTTCTACCAGGGCCACGTAG   |
| ENSG00000151651 | ADAM8  | CTGATCGAGCCCCTGGATGA   |
| ENSG00000134684 | YARS   | TTACTGGGGAACGGCAACCA   |
| ENSG00000134684 | YARS   | TCATGTTATCCAGGTATGCG   |
| ENSG00000134684 | YARS   | GAGAAGCTCAAGTTCATCAA   |
| ENSG00000120156 | TEK    | AGGTGTA CT TCTAGAATATC |
| ENSG00000120156 | TEK    | GTACAGAGATGGTTGCATTC   |
| ENSG00000120156 | TEK    | CTACTGAGAAATGATCCGTA   |
| ENSG00000131759 | RARA   | GAAGGTGCGCAAAGCGCACC   |
| ENSG00000131759 | RARA   | GAGGGTGATCTGGTCGGCGA   |
| ENSG00000131759 | RARA   | AGATGGATGATGCGGAGACG   |
| ENSG00000165417 | GTF2A1 | CTGAGGCTGAAAGATATATT   |
| ENSG00000165417 | GTF2A1 | ACAAGCTCCTGTTATACAGC   |
| ENSG00000165417 | GTF2A1 | AGTGGATGAACAAGTACTGA   |
| ENSG00000087095 | NLK    | ACCAGATTCTGGAAGACGTT   |
| ENSG00000087095 | NLK    | TCTCTTGCAAAGGGTCTTC    |
| ENSG00000087095 | NLK    | GTGGAGGTTGGAGTATGTCA   |
| ENSG00000136485 | DCAF7  | TTGATACGACATGCACCATC   |
| ENSG00000136485 | DCAF7  | TTTGTCATGGGCGATCAGCT   |

|                 |        |                      |
|-----------------|--------|----------------------|
| ENSG00000099139 | PCSK5  | ACCATAGCAGGACGATTAAA |
| ENSG00000099139 | PCSK5  | AGAAGTGGTAGTAGTCCTTC |
| ENSG00000099139 | PCSK5  | ATTGCTTTCAACGCCAAGAT |
| ENSG00000187758 | ADH1A  | ACAGACTTTCTCTAGAGGCG |
| ENSG00000187758 | ADH1A  | GGCCCATGAAGTTCGTATTA |
| ENSG00000187758 | ADH1A  | GTCCAGTGTAAGCAATCCTC |
| ENSG00000120833 | SOCS2  | TGCTGACGTGTAGAGCGGTT |
| ENSG00000120833 | SOCS2  | AGGTGAACAGTGCCGTTCCG |
| ENSG00000120833 | SOCS2  | CGCCATTCCCGGAGGGCTCA |
| ENSG00000196361 | ELAVL3 | GTTGGTCTTGCTGTCGTCAG |
| ENSG00000196361 | ELAVL3 | TCTGTAATTTGAGGCCGTTG |
| ENSG00000196361 | ELAVL3 | ATGCTAACCTGTACGTCAGC |
| ENSG00000171861 | MRM3   | TTATTCCTTGTGGCGTTACG |
| ENSG00000171861 | MRM3   | GCCACATAGACCCGAGTGTC |
| ENSG00000062038 | CDH3   | GATGACTTCACTGTGCGGAA |
| ENSG00000062038 | CDH3   | GTGTCTTCGTAAGATACGTT |
| ENSG00000062038 | CDH3   | CACCATTCTCTGACACAGCG |
| ENSG00000135750 | KCNK1  | GAAGTAGAGGACCGGCCTGC |
| ENSG00000135750 | KCNK1  | TATTGCCATGTTGGTAGTTC |
| ENSG00000135750 | KCNK1  | TTCAGAGAGCTCTATAAGAT |
| ENSG00000174125 | TLR1   | AATTTCAAACGTGAAGCTAC |
| ENSG00000174125 | TLR1   | GGAATGGAGTACTGCGGAAT |
| ENSG00000174125 | TLR1   | ATAGTGGGCACGATTCTTTC |

|                 |         |                      |
|-----------------|---------|----------------------|
| ENSG00000155545 | MIER3   | ACTTGGGGAACTATTTGCAC |
| ENSG00000155545 | MIER3   | TACTGCATGTGATGGTGATA |
| ENSG00000155545 | MIER3   | ACCTTGTTGAGACTTCATTA |
| ENSG00000102241 | HTATSF1 | GACGGACACTCCCTACGAGT |
| ENSG00000102241 | HTATSF1 | GCTACATATCAGGCCAATTA |
| ENSG00000102241 | HTATSF1 | TCTGGCATCAGTGGGTCCG  |
| ENSG00000119801 | YPEL5   | TCACATCTCGAACCATGTGG |
| ENSG00000119801 | YPEL5   | GACAGCCAGCGATATAAGGA |
| ENSG00000119801 | YPEL5   | AGCTCACATCTCGAACCATG |
| ENSG00000108424 | KPNB1   | GCACATGAAGGAGTCGACAT |
| ENSG00000108424 | KPNB1   | ACCAGCTGAGGAATGAGTTC |
| ENSG00000108424 | KPNB1   | GCTAGCTTCACATTACT    |
| ENSG00000162923 | WDR26   | GCATGAGGAGATCAACAGTC |
| ENSG00000162923 | WDR26   | CATGACATGATTTCGGAATT |
| ENSG00000162923 | WDR26   | GAAGTACCTAGAATACCTGG |
| ENSG00000146457 | WTAP    | CTTGGGAAGAGGTTCTTCGT |
| ENSG00000146457 | WTAP    | CAAGTTGTGCAATACGTCCC |
| ENSG00000176887 | SOX11   | GTCTGGGTCGCTCTCGTCCA |
| ENSG00000122692 | SMU1    | ATCCTTAGAAAAGCTTAGAC |
| ENSG00000122692 | SMU1    | CTTTTTCAGGCATACCCAGA |
| ENSG00000122692 | SMU1    | CCTTCAAGTACTGCATAATA |
| ENSG00000122882 | ECD     | GCTGTGAATAGGCGCATCAG |
| ENSG00000122882 | ECD     | GCAGGTCAATAGGGTCTCGT |

|                 |         |                       |
|-----------------|---------|-----------------------|
| ENSG00000122882 | ECD     | AGAAGGTTCTGCTCAGTACC  |
| ENSG00000129351 | ILF3    | TTCCTGCTCGTCTATCCAGT  |
| ENSG00000129351 | ILF3    | CATCACTCCCCGCAGGGTTC  |
| ENSG00000129351 | ILF3    | TGCCTGTCCAGAACGTCCGG  |
| ENSG00000165699 | TSC1    | ATGCTGGACTCCCCATGCT   |
| ENSG00000165699 | TSC1    | CACCTTGGTGGATTATTACC  |
| ENSG00000165699 | TSC1    | GACGTCGTTGTCCTCACAAAC |
| ENSG00000100138 | SNU13   | CTTGGAGCGCACAAACACGT  |
| ENSG00000186591 | UBE2H   | GCTTGATTCTTCTGGTCGG   |
| ENSG00000186591 | UBE2H   | CATCCAGAAATACGCCACGG  |
| ENSG00000161547 | SRSF2   | CCAAGTCCAGATCCGCACGA  |
| ENSG00000161547 | SRSF2   | CCTGGACCGCAACGAGATC   |
| ENSG00000161547 | SRSF2   | TCACGACAAGCGCGACGCTG  |
| ENSG00000115875 | SRSF7   | CATTTGGATCAAAGGGACGT  |
| ENSG00000115875 | SRSF7   | GATACTCTCGCTCAGCAGC   |
| ENSG00000204569 | PPP1R10 | AGAAGTTCTTTGGGGTCTAT  |
| ENSG00000204569 | PPP1R10 | AGTGAGCGGTAGATGCTGCA  |
| ENSG00000171862 | PTEN    | AATCCCATAGCAATAATGTT  |
| ENSG00000171862 | PTEN    | AACTTGTCTTCCCGTCGTGT  |
| ENSG00000171862 | PTEN    | CAATTCAGGACCCACACGAC  |
| ENSG00000114209 | PDCD10  | GGTTTGATGAATTAGTCGGT  |
| ENSG00000114209 | PDCD10  | ATATCAATACCAGAACC2GCA |
| ENSG00000105618 | PRPF31  | TCCTGCACATCCTCGATCGC  |

|                 |         |                      |
|-----------------|---------|----------------------|
| ENSG00000105618 | PRPF31  | CAGCTCGTTTTCGATCTCCA |
| ENSG00000105618 | PRPF31  | ACTTATCCCGGATGAACTTA |
| ENSG00000125952 | MAX     | ATGCACTGGAACGAAAACGT |
| ENSG00000125952 | MAX     | CAGGAAGAAGCTCCGGATGG |
| ENSG00000125952 | MAX     | CACCATCTCTGCCTTCGATG |
| ENSG00000171634 | BPTF    | GTTCCGCAGTACCTCGTAAA |
| ENSG00000171634 | BPTF    | TATATTCGACATGAACCTAT |
| ENSG00000171634 | BPTF    | GCTATCTGGATTCCGCAATC |
| ENSG00000169564 | PCBP1   | GGAGTCAATTCCGGCGAATC |
| ENSG00000169564 | PCBP1   | TGGCGCGCGGATCAACATCT |
| ENSG00000169564 | PCBP1   | CGCTATGATCATCGACAAGC |
| ENSG00000135473 | PAN2    | CTCCTCGTGCAAGTCAAAGT |
| ENSG00000135473 | PAN2    | CTACTCTGAATTGCACAGCG |
| ENSG00000135473 | PAN2    | GCAGCACTCTACTCGTTGGT |
| ENSG00000060339 | CCAR1   | GAGGACAGAAGAATCCGCCA |
| ENSG00000060339 | CCAR1   | TGTGTTAAGAGGGTTTGCTG |
| ENSG00000060339 | CCAR1   | GTAGACAGGCTAAGGCTTGT |
| ENSG00000115607 | IL18RAP | GTTGCAGGAGAGCGAATTAA |
| ENSG00000115608 | IL18RAP | TAAAATCATCTTGACACAAC |
| ENSG00000115609 | IL18RAP | CTCACAGGATGCATTTGTCT |
| ENSG00000134884 | ARGLU1  | TGAACGAGAAGTTCTCCGAA |
| ENSG00000134884 | ARGLU1  | AATAGAAGAAAACTCATCG  |
| ENSG00000134884 | ARGLU1  | TGAGGAGCTAGAGCGAATAC |

|                 |        |                       |
|-----------------|--------|-----------------------|
| ENSG00000163635 | ATXN7  | AACGGCCAAAGGCGGCTTGC  |
| ENSG00000163635 | ATXN7  | GGAAGCAACCGTTCTCCAG   |
| ENSG00000163635 | ATXN7  | GCATGTCAAAGACCGGGTGC  |
| ENSG00000135801 | TAF5L  | CATCTGAGTCCACGTA CTGC |
| ENSG00000135801 | TAF5L  | CTGTGCTCTTCGGACTGTTT  |
| ENSG00000135801 | TAF5L  | GGACA ACTCGGTGCGCGTCT |
| ENSG00000086598 | TMED2  | TTGGAGTCATGGTGGACATC  |
| ENSG00000086598 | TMED2  | AAAGCACGAACAGGAATACA  |
| ENSG00000086598 | TMED2  | AACAGGAATACATGGAAGTC  |
| ENSG00000108883 | EFTUD2 | ATCATGACGATGACCACCT   |
| ENSG00000108883 | EFTUD2 | CTTTGTGGACATCTCCACCA  |
| ENSG00000108883 | EFTUD2 | CAAGATTGACCGGCTGATCC  |
| ENSG00000139549 | DHH    | TAAGGAGCGGGTGAACGCTT  |
| ENSG00000139549 | DHH    | AACACCGGTGCAAAGTCGCC  |
| ENSG00000139549 | DHH    | AGTCACTCGTAGGCGCACTC  |
| ENSG00000083312 | TNPO1  | TAAAGTCTGTTACACCATTT  |
| ENSG00000083312 | TNPO1  | GATCACA ACTATAGCCTCCA |
| ENSG00000083312 | TNPO1  | TTTTCACCGATCGAGGACGG  |
| ENSG00000105576 | TNPO2  | GTCTGGTCAGGACGAAAATC  |
| ENSG00000105576 | TNPO2  | AATGGTGGCTCGGATGAGCG  |
| ENSG00000105576 | TNPO2  | GTGCCTTACGTTGTTCTTG   |
| ENSG00000114030 | KPNA1  | AGGCGAAAGTTCTCTTTTCC  |
| ENSG00000114030 | KPNA1  | GCACACCAGGAGTAGTGCC   |

|                 |       |                       |
|-----------------|-------|-----------------------|
| ENSG00000114030 | KPNA1 | CCATGACCCGGAATGCAGTA  |
| ENSG00000182481 | KPNA2 | AGCCCGGATTATGTTGTCTA  |
| ENSG00000182481 | KPNA2 | ACCATGCCAATTCGTTTCATT |
| ENSG00000182481 | KPNA2 | ATCTGCTCAACAGCATCTAT  |
| ENSG00000102753 | KPNA3 | CATTACAGTTTGAAGCTGCT  |
| ENSG00000102753 | KPNA3 | AACAACCTGGGTCTGCTCGT  |
| ENSG00000102753 | KPNA3 | TTACAGCTTGAACCTGTTGC  |
| ENSG00000186432 | KPNA4 | AATGCTTCAAGTGATAACCA  |
| ENSG00000186432 | KPNA4 | TTCTTCTATAAGATTGCCTA  |
| ENSG00000186432 | KPNA4 | TATAGATGGTGATTATAGAG  |
| ENSG00000196911 | KPNA5 | TGACCCAGCATTGTACCTC   |
| ENSG00000196911 | KPNA5 | TAAAGTTGAAATCCATCCAT  |
| ENSG00000196911 | KPNA5 | ACTTGATCTATTGGTGGATT  |
| ENSG00000025800 | KPNA6 | CATGAGAAGACTATCGAACA  |
| ENSG00000025800 | KPNA6 | ACTTCATCTATTGGAGGACT  |
| ENSG00000025800 | KPNA6 | GGCAATATTCGTTAGAGCCC  |
| ENSG00000185467 | KPNA7 | G TTCAGCATACCCGCATCAA |
| ENSG00000185467 | KPNA7 | CCCCGCTGCTACGTTGCTCA  |
| ENSG00000196497 | IPO4  | GACTGAACACCCGCTGGCGA  |
| ENSG00000196497 | IPO4  | CTGCAGGGCCGTGAGGATCA  |
| ENSG00000196497 | IPO4  | CTCAGCCACCATTTTCGAA   |
| ENSG00000065150 | IPO5  | CAAGAGACGTCTTAGGAGAA  |
| ENSG00000065150 | IPO5  | GATGGCAGTCTGAACATCAG  |

|                 |       |                       |
|-----------------|-------|-----------------------|
| ENSG00000205339 | IPO7  | TAGCCAACAAGCACTGTTAT  |
| ENSG00000205339 | IPO7  | AACATGATTATCCAAGCCGC  |
| ENSG00000205339 | IPO7  | ACCAATGGACTCCGCTCCTC  |
| ENSG00000133704 | IPO8  | TCTTCCGAACTATTATCGAC  |
| ENSG00000133704 | IPO8  | TGAGGATGATAGACCAGAAC  |
| ENSG00000133704 | IPO8  | CTTTTTGAAAACCTATGCAG  |
| ENSG00000198700 | IPO9  | AATCTCCACGGCTCGGGAAC  |
| ENSG00000198700 | IPO9  | GCTGTACCACGGGAAAGATC  |
| ENSG00000198700 | IPO9  | ATGGCCCCACATCTGACAGT  |
| ENSG00000086200 | IPO11 | AACATGGAATTGATCGCTAC  |
| ENSG00000086200 | IPO11 | GAGAAACTACTCTGCGTGC   |
| ENSG00000086200 | IPO11 | TGTGCTGTCTGAAGATCATCC |
| ENSG00000117408 | IPO13 | CAGCCGAGTCAGTACAATCT  |
| ENSG00000117408 | IPO13 | CGCCTACCCAGTACCGCAA   |
| ENSG00000117408 | IPO13 | TGGCATCTGTCTGCATCGCTG |
| ENSG00000047410 | TPR   | GCCGCAAGCTTTGACACTCT  |
| ENSG00000047410 | TPR   | GTGGAATTTCTCTCCATAC   |
| ENSG00000047410 | TPR   | AAAGAGCAATGAACTAACCC  |

**Appendix Table S5** TPM of RBM3 mRNA upon specified RBM3 regulator KD compared to the control in K562 and HepG2 cells from ENCODE.

| Gene (knocked down) | RBM3 TPM | Gene TPM | Experiment ID | Cell Type |
|---------------------|----------|----------|---------------|-----------|
| HNRNPH1             | 44.21    | 472.5    | ENCFF039DFP   | K562      |
| HNRNPH1             | 44.93    | 412.45   | ENCFF713MXN   |           |
| Control             | 111.84   | 447.63   | ENCFF616BYI   |           |
| Control             | 126.13   | 466.88   | ENCFF586TGE   |           |
| HNRNPH1             | 32.46    | 392.48   | ENCFF293ODK   | HepG2     |
| HNRNPH1             | 36.26    | 361.24   | ENCFF266YWO   |           |
| Control             | 105.37   | 650.81   | ENCFF053QJC   |           |
| Control             | 106.98   | 657.38   | ENCFF200BWY   |           |
| SNRNP70             | 22.15    | 43.97    | ENCFF367WUN   | HepG2     |
| SNRNP70             | 21.45    | 29.54    | ENCFF058OGQ   |           |
| Control             | 36.55    | 125.33   | ENCFF873KLR   |           |
| Control             | 43.65    | 159.84   | ENCFF311ACC   |           |
| PUF60               | 85.57    | 32.65    | ENCFF682SFK   | K562      |
| PUF60               | 85.62    | 23.87    | ENCFF461EMF   |           |
| Control             | 197.6    | 75.15    | ENCFF585BAL   |           |
| Control             | 196.86   | 73.91    | ENCFF643OYR   |           |
| KPNB1               | 170.59   | 104.44   | ENCFF933IUO   | K562      |
| KPNB1               | 174.8    | 120.52   | ENCFF298FLZ   |           |

|         |        |        |            |       |
|---------|--------|--------|------------|-------|
| Control | 179.89 | 373.34 | ENCF160UOH | HepG2 |
| Control | 159.96 | 356.98 | ENCF116ZHL |       |
| KPNB1   | 101.47 | 102.87 | ENCF819AUU |       |
| KPNB1   | 98.51  | 107.14 | ENCF628VDB |       |
| Control | 86.41  | 251.29 | ENCF565TSG |       |
| Control | 90.62  | 253.73 | ENCF073IFA |       |

**Appendix Table S6** Analysis of RBM3 transcript alternative splicing in HNRNPH1 KD versus WT i-neurons, K562 and HepG2 cells by rMATS

| Cell type | exonStart_Obase | exonEnd  | upstreamES | upstreamEE | downstreamES | downstreamEE | FDR        | IncLevel1               | IncLevel2               | IncLevelDifference | Note                                        |
|-----------|-----------------|----------|------------|------------|--------------|--------------|------------|-------------------------|-------------------------|--------------------|---------------------------------------------|
| i-neuron  | 48575560        | 48575630 | 48575167   | 48575283   | 48576313     | 48576419     | 1          | 0.942,0.932,0.988,0.969 | 0.967,0.971,0.952,0.956 | -0.004             |                                             |
| i-neuron  | 48575560        | 48575667 | 48574951   | 48575283   | 48575814     | 48576083     | 1          | 1.0,0.996,1.0,1.0       | 1.0,1.0,1.0,1.0         | -0.001             |                                             |
| i-neuron  | 48575560        | 48575667 | 48574951   | 48575283   | 48576313     | 48576419     | 1          | 0.984,0.978,0.996,0.991 | 0.99,0.991,0.984,0.986  | 0                  | Exon 3 Inclusion (relative to Exon 2 and 4) |
| i-neuron  | 48575560        | 48575667 | 48574951   | 48575283   | 48577025     | 48577109     | 1          | 1.0,1.0,1.0,0.997       | 1.0,1.0,1.0,1.0         | -0.001             | Exon 3 Inclusion (relative to Exon 2 and 6) |
| i-neuron  | 48575560        | 48576083 | 48575167   | 48575283   | 48576313     | 48576419     | 1          | 0.912,0.883,0.979,0.948 | 0.943,0.947,0.913,0.921 | -0.001             |                                             |
| i-neuron  | 48575814        | 48576083 | 48575167   | 48575283   | 48576313     | 48576419     | 1.09E-14   | 0.46,0.416,0.793,0.592  | 0.154,0.114,0.075,0.067 | 0.463              |                                             |
| i-neuron  | 48575814        | 48576083 | 48575560   | 48575667   | 48576313     | 48576419     | 0          | 0.022,0.027,0.02,0.022  | 0.002,0.002,0.002,0.002 | 0.021              | Exon 3a-L Inclusion                         |
| i-neuron  | 48575921        | 48576083 | 48575560   | 48575667   | 48576313     | 48576419     | 0.03201581 | 0.014,0.016,0.015,0.014 | 0.001,0.001,0.002,0.001 | 0.013              | Exon 3a-S Inclusion                         |
| i-neuron  | 48576313        | 48576419 | 48575167   | 48575283   | 48577025     | 48577109     | 1          | 1.0,1.0,1.0,0.724       | 1.0,1.0,1.0,1.0         | -0.069             | Exon 4 Inclusion (relative to Exon 2 and 6) |
| i-neuron  | 48576313        | 48576419 | 48575560   | 48575667   | 48577025     | 48577109     | 1          | 1.0,1.0,1.0,0.997       | 1.0,1.0,1.0,1.0         | -0.001             | Exon 4 Inclusion (relative to Exon 3 and 6) |
| i-neuron  | 48576507        | 48576604 | 48575898   | 48576419   | 48577025     | 48577109     | 1          | 1.0,1.0,1.0,1.0         | 1.0,1.0,1.0,1.0         | 0                  | Exon 5 Inclusion (relative to Exon 4 and 6) |
| K562      | 48575560        | 48575630 | 48575167   | 48575283   | 48576313     | 48576419     | 1          | 1.0,1.0                 | 1.0,0.98                | 0.01               |                                             |
| K562      | 48575560        | 48575667 | 48574951   | 48575283   | 48575814     | 48576083     | 1          | 1.0,1.0                 | 1.0,0.985               | 0.008              |                                             |

|       |          |          |          |          |          |          |          |             |             |        |                     |
|-------|----------|----------|----------|----------|----------|----------|----------|-------------|-------------|--------|---------------------|
| K562  | 48575560 | 48575667 | 48574951 | 48575283 | 48576313 | 48576419 | 1        | 1.0,1.0     | 1.0,0.991   | 0.004  |                     |
| K562  | 48575560 | 48576083 | 48575167 | 48575283 | 48576313 | 48576419 | 1        | 1.0,1.0     | 1.0,0.98    | 0.01   |                     |
| K562  | 48575814 | 48576083 | 48575167 | 48575283 | 48576313 | 48576419 | 1        | 1.0,1.0     | 1.0,0.973   | 0.014  |                     |
| K562  | 48575814 | 48576083 | 48575560 | 48575667 | 48576313 | 48576419 | 6.78E-09 | 0.127,0.128 | 0.411,0.293 | -0.224 | Exon 3a-L Inclusion |
| K562  | 48575921 | 48576083 | 48575560 | 48575667 | 48576313 | 48576419 | 1.46E-07 | 0.112,0.115 | 0.396,0.264 | -0.217 | Exon 3a-S Inclusion |
| HepG2 | 48575560 | 48575630 | 48575167 | 48575283 | 48576313 | 48576419 | 1        | 1.0,1.0     | 0.833,1.0   | 0.084  |                     |
| HepG2 | 48575560 | 48575667 | 48574951 | 48575283 | 48576313 | 48576419 | 1        | 1.0,1.0     | 0.899,1.0   | 0.05   |                     |
| HepG2 | 48575560 | 48576083 | 48575167 | 48575283 | 48576313 | 48576419 | 1        | 1.0,1.0     | 0.811,1.0   | 0.095  |                     |
| HepG2 | 48575814 | 48576083 | 48575560 | 48575667 | 48576313 | 48576419 | 2.03E-06 | 0.081,0.114 | 0.301,0.487 | -0.296 | Exon 3a-L Inclusion |
| HepG2 | 48575921 | 48576083 | 48575560 | 48575667 | 48576313 | 48576419 | 3.44E-08 | 0.056,0.094 | 0.294,0.418 | -0.281 | Exon 3a-S Inclusion |

**Appendix Table S7** Key resources used in this study

| REAGENT or RESOURCE                   | SOURCE                        | IDENTIFIER     |
|---------------------------------------|-------------------------------|----------------|
| <b>Antibodies</b>                     |                               |                |
| Rabbit anti-RBM3 antibody             | Proteintech                   | Cat#14363-1-AP |
| Rabbit anti-GFP antibody              | Abcam                         | Cat#ab290      |
| Mouse anti-Cas9 antibody              | Cell Signaling                | Cat#14597S     |
| Mouse anti-GAPDH antibody             | Santa Cruz                    | Cat#sc-32233   |
| Rabbit anti-HNRNPH1 antibody          | Bethyl                        | Cat#A300-511A  |
| Mouse anti-FLAG                       | Sigma                         | Cat#F1804      |
| Rabbit anti-HNRNPH1 antibody          | Abcam                         | Cat#ab13074    |
| Rabbit anti-HNRNPH1 antibody          | ProteinTech                   | Cat#14774-1-AP |
| Mouse anti-HNRNPH/F antibody          | Santa Cruz                    | Cat#sc-32310   |
| Rabbit IgG                            | Santa Cruz                    | Cat#sc-2027    |
| Mouse IgG                             | Santa Cruz                    | Cat#sc-2025    |
| Rabbit anti-SmD3 antibody             | Antibodies Online             | Cat#ABIN653228 |
| Mouse anti-SmB (Sm proteins) antibody | (Lerner <i>et al.</i> , 1981) | N/A            |

|                                                                                              |                         |                 |
|----------------------------------------------------------------------------------------------|-------------------------|-----------------|
| Goat anti-rabbit HRP secondary antibody                                                      | Biorad                  | Cat#1706515     |
| Goat anti-mouse HRP secondary antibody                                                       | Biorad                  | Cat#1706516     |
| Donkey anti-rabbit 680LT                                                                     | LI-COR                  | Cat#926-68023   |
| Donkey anti-mouse 680LT                                                                      | LI-COR                  | Cat#926-68022   |
| Donkey anti-rabbit 800CW                                                                     | LI-COR                  | Cat#926-32213   |
| Donkey anti-mouse 800CW                                                                      | LI-COR                  | Cat#926-32212   |
| <b>Bacterial and virus strains</b>                                                           |                         |                 |
| 5-alpha Competent E. coli                                                                    | NEB                     | Cat#C2987       |
| One Shot ccdB Survival 2 T1R Competent Cells                                                 | ThermoFisher Scientific | Cat#A10460      |
| Stable Competent E. coli (High Efficiency)                                                   | NEB                     | Cat#C30401      |
| Lentivirus: pLVPB-gCherry-PGK-BFP-2A-mCherry                                                 | This study              | N/A             |
| Lentivirus: whole-genome CRISPR sgRNA library                                                | This study              | N/A             |
| Lentivirus: sgRNA-expressing lentivirus (each contains one of the sgRNAs listed in Table S1) | This study              | N/A             |
| <b>Chemicals, peptides, and recombinant proteins</b>                                         |                         |                 |
| TeSR-E8 Medium                                                                               | Stemcell Technologies   | Cat#05990       |
| StemFlex Medium                                                                              | ThermoFisher Scientific | Cat#A3349401    |
| EDTA, pH8.0                                                                                  | ThermoFisher Scientific | Cat#15575020    |
| Vitronectin                                                                                  | ThermoFisher Scientific | Cat#A14700      |
| Cryostor Cs10 Cryopreservation                                                               | Merck                   | Cat#C2874-100ML |
| StemPro Accutase Cell Dissociation Reagent                                                   | ThermoFisher Scientific | Cat#A1110501    |
| 0.25% Trypsin-EDTA                                                                           | Merck                   | Cat#T4049       |
| Rho-associated protein kinase (ROCK) inhibitor                                               | BD Biosciences          | Cat#Y-27632     |

|                                                   |                             |                     |
|---------------------------------------------------|-----------------------------|---------------------|
| Geltrex LDEV-Free, hESC-Qualified, Reduced Growth | Life Technologies           | Cat#A1413302        |
| DMEM/F12, GlutaMAX Supplement                     | Thermo Fisher Scientific    | Cat#31331028        |
| N-2 Supplement (100X)                             | Thermo Fisher Scientific    | Cat#17502048        |
| MEM Non-Essential Amino Acids Solution (100X)     | Thermo Fisher Scientific    | Cat# 11140050       |
| 2-Mercaptoethanol (50 mM)                         | Thermo Fisher Scientific    | Cat#31350010        |
| Doxycycline hyclate                               | Merck                       | Cat#D9891           |
| Neurobasal medium                                 | Thermo Fisher Scientific    | Cat#21103049        |
| Neurobasal medium, minus phenol red               | Thermo Fisher Scientific    | Cat#12348017        |
| B-27 Supplement (50X), minus vitamin A            | Thermo Fisher Scientific    | Cat#12587010        |
| GlutaMAX Supplement                               | Thermo Fisher Scientific    | Cat# 35050061       |
| Neurotrophin-3 (NT-3)                             | PeproTech                   | Cat#450-03          |
| Brain Derived Neurotrophic Factor (BDNF)          | PeproTech                   | Cat#450-02          |
| Penicillin-Streptomycin                           | Thermo Fisher Scientific    | Cat#15140122        |
| HiFi Cas9 nuclease V3                             | Integrated DNA Technologies | Cat#1081060         |
| Proteinase K, recombinant, PCR grade              | Thermo Fisher Scientific    | Cat#EO0491          |
| Sodium Acetate, 3M, pH 5.2                        | Merck                       | Cat#567422-100ML    |
| Poly-L-lysine                                     | Merck                       | Cat#P4707           |
| Laminin                                           | Merck                       | Cat#L2020-1MG       |
| Dithiothreitol (DTT)                              | Thermo Fisher Scientific    | Cat#R0861, 11896744 |

|                                                  |                          |                 |
|--------------------------------------------------|--------------------------|-----------------|
| Tween-20                                         | Merck                    | Cat#P9416-50ML  |
| RIPA buffer                                      | Merck                    | Cat#R0278-500ML |
| DNase 1                                          | Zymo                     | Cat#E1011-A     |
| Protein G Dynabeads                              | Life Technologies        | Cat#100090      |
| HALT protease inhibitor cocktail                 | Thermo Fisher Scientific | Cat#1861278     |
| TRIzol                                           | Invitrogen               | Cat#15596018    |
| HALT protease and phosphatase inhibitor cocktail | Thermo Fisher Scientific | Cat#78442       |
| cComplete, EDTA-free Protease Inhibitor Cocktail | Merck/Roche              | Cat#11873580001 |
| Cycloheximide                                    | Biovision                | Cat#1041-1      |
| Actinomycin D                                    | Merck                    | Cat#A1410-2MG   |
| SMG1 inhibitor                                   | ProbeChem                | Cat#PC-35788    |
| Pyridostatin hydrochloride                       | Merck                    | Cat#SML2690-5MG |
| Donkey serum                                     | Merck                    | Cat#D9663       |
| Hoechst                                          | Thermo Fisher Scientific | Cat#62249       |
| <b>Critical commercial assays</b>                |                          |                 |
| RNeasy Plus Mini Kit                             | Qiagen                   | Cat#74134       |
| Absolutely RNA Minprep Kit                       | Agilent                  | Cat#400800      |
| SuperScript IV First-Strand Synthesis System     | Thermo Fisher Scientific | Cat#18091050    |
| Q5 High-Fidelity DNA Polymerase                  | NEB                      | Cat#M0492L      |
| NEBuilder HiFi DNA Assembly Master Mix           | NEB                      | Cat#E2621L      |
| GoTaq Taq G2 Green Master Mix                    | Promega                  | Cat#M7823       |
| Guide-it Long ssDNA Production System, 25 Rxns   | Takara Bio               | Cat#632644      |
| P3 Primary Cell 4D-Nucleofector Kit L (12 RXN)   | Lonza                    | Cat#V4XP-3012   |

|                                                  |                             |               |
|--------------------------------------------------|-----------------------------|---------------|
| Alt-R HDR Enhancer, 500 µL                       | Integrated DNA Technologies | Cat#226687070 |
| Qubit RNA Broad Range Assay Kit                  | Thermo Fisher Scientific    | Cat#Q10211    |
| RNA Screentape                                   | Agilent                     | Cat#5067-5576 |
| RNA Screentape Ladder                            | Agilent                     | Cat#5067-5578 |
| RNA Screentape Buffer                            | Agilent                     | Cat#5067-5577 |
| Loading tips, 10 pk                              | Agilent                     | Cat#5067-5599 |
| DNA HS D1000 Screentape                          | Agilent                     | Cat#5067-5584 |
| DNA HS D1000 Screentape Buffer                   | Agilent                     | Cat#5067-5585 |
| DNA HS D1000 Screentape Ladder                   | Agilent                     | Cat#5067-5587 |
| TruSeq Stranded mRNA Library Prep                | Illumina                    | Cat#20020594  |
| Qubit RNA BR Assay Kit                           | Thermo Fisher Scientific    | Cat#Q10211    |
| Qubit dsDNA BR Assay Kit                         | Thermo Fisher Scientific    | Cat#Q32853    |
| BCA Protein Assay Kit                            | Thermo Fisher Scientific    | Cat#23225     |
| Immobilon Western Chemiluminescent HRP Substrate | Merck                       | Cat#WBKLS0500 |
| Lipofectamine LTX Reagent with Plus Reagent      | Thermo Fisher Scientific    | Cat#A12621    |
| NEBNext Library Quant Kit for Illumina           | NEB                         | Cat#E7630L    |
| AMPure XP Reagent for PCR Purification           | Beckman Coulter             | Cat#A63881    |
| NextSeq 500/550 High Output Kit v2.5 (75 Cycles) | Illumina                    | Cat#20024906  |
| Lipofectamine 2000 reagent                       | Thermo Fisher Scientific    | Cat#11668-027 |
| TransIT-LT1                                      | Mirus                       | Cat#22043217  |
| dNTP Mix                                         | Thermo Fisher Scientific    | Cat#R0192     |

|                                                                            |                                    |                    |
|----------------------------------------------------------------------------|------------------------------------|--------------------|
| RiboLock RNase inhibitor                                                   | Thermo Fisher Scientific           | Cat#EO0381         |
| AffinityScript Multi temperature Multiple Reverse Transcriptase            | Agilent                            | Cat#600107-51      |
| AffinityScript RT buffer                                                   | Agilent                            | Cat#600100-52      |
| DTT                                                                        | Agilent                            | Cat#600100-53      |
| QuickChange Lightning Multi Site-Directed Mutagenesis Kit                  | Agilent                            | Cat#210513         |
| <b>Experimental models: Cell lines</b>                                     |                                    |                    |
| Human iPSC/iPSC-derived neuron: Bob (wild-type)                            | (Pawlowski <i>et al.</i> , 2017)   | N/A                |
| Human iPSC/iPSC-derived neuron: Cas9                                       | This study                         | N/A                |
| Human iPSC/iPSC-derived neuron: GFP-RBM3                                   | This study                         | N/A                |
| HeLa                                                                       | ECACC                              | Cat#93021013       |
| HEK293T (Lenti-X 293T)                                                     | Clontech Takara                    | Cat#632180         |
| <b>Oligonucleotides</b>                                                    |                                    |                    |
| Primers used in this study are listed in Table S1                          | This study                         | N/A                |
| RBM3-N gRNA#1 - 5' CUGCCAUGUCCUCUGAAGA 3'                                  | This study                         | N/A                |
| RBM3-N gRNA#2 - 5' UUUCCUUCUUCAGAGGACA 3'                                  | This study                         | N/A                |
| HNRNPH siRNA#1 - 5' GGAAAUAGCUGAAAAGGCuTdT 3'                              | Microsynth                         | Cat#2288931        |
| HNRNPH siRNA#2 - 5' GAGAGUACACAUUGAAAUuTdT 3'                              | Microsynth                         | Cat#2276387        |
| Control siRNA                                                              | Dharmacon                          | Cat#D-001810-10-20 |
| <b>Recombinant DNA</b>                                                     |                                    |                    |
| Plasmid: pcDNA3-EGFP                                                       | Addgene                            | Cat#13031          |
| Plasmid: GFP-RBM3 repair template                                          | This study                         | N/A                |
| Plasmid: pLVPB-gCherry-PGK-BFP-2A-mCherry                                  | This study                         | N/A                |
| Lentiviral sgRNA cloning vector: pLVPB_U6_sgRNAv2fl_shortccdB_PGK_Puro_BFP | (Metzakopian <i>et al.</i> , 2017) | N/A                |

|                                                                                                                           |                                          |                                                                                                                                                                                         |
|---------------------------------------------------------------------------------------------------------------------------|------------------------------------------|-----------------------------------------------------------------------------------------------------------------------------------------------------------------------------------------|
| Lentiviral sgRNA expression plasmids (all sgRNA sequences listed in Table S1 individually cloned into the cloning vector) | This study                               | N/A                                                                                                                                                                                     |
| Lentiviral packaging plasmid: psPax2                                                                                      | Addgene                                  | Cat#12260                                                                                                                                                                               |
| Lentiviral packaging plasmid: pMD2.G                                                                                      | Addgene                                  | Cat#12259                                                                                                                                                                               |
| Plasmid: RBM3 Minigene                                                                                                    | This study                               | N/A                                                                                                                                                                                     |
| Plasmid: delGGGG-RBM3 Minigene                                                                                            | This study                               | N/A                                                                                                                                                                                     |
| <b>Software and algorithms</b>                                                                                            |                                          |                                                                                                                                                                                         |
| Prism (v9.0.2)                                                                                                            | GraphPad                                 | <a href="https://www.graphpad.com">https://www.graphpad.com</a>                                                                                                                         |
| Design and Analysis Software (v2.6.0)                                                                                     | Thermo Fisher Scientific                 | N/A                                                                                                                                                                                     |
| FIJI (v2.1.0)                                                                                                             | <a href="#">(Schindelin et al. 2012)</a> | <a href="https://fiji.sc/">https://fiji.sc/</a>                                                                                                                                         |
| MATLAB (R2020a)                                                                                                           | MathWorks                                | <a href="https://www.mathworks.com">https://www.mathworks.com</a>                                                                                                                       |
| MAGeCK RRA                                                                                                                | <a href="#">(Li et al. 2014)</a>         | <a href="https://sourceforge.net/projects/mageck/">https://sourceforge.net/projects/mageck/</a>                                                                                         |
| Bcl2fastq (v2.2.0)                                                                                                        | Illumina                                 | <a href="https://emea.support.illumina.com/downloads/bcl2fastq-conversion-software-v2-20.html">https://emea.support.illumina.com/downloads/bcl2fastq-conversion-software-v2-20.html</a> |
| Metascape (v3.5)                                                                                                          | <a href="#">(Zhou et al. 2019)</a>       | <a href="https://metascape.org/">https://metascape.org/</a>                                                                                                                             |
| STRING (v11.5)                                                                                                            | <a href="#">(Szklarczyk et al. 2020)</a> | <a href="https://string-db.org/">https://string-db.org/</a>                                                                                                                             |
| FlowJo (v10.7.2)                                                                                                          | BD Biosciences                           | <a href="https://www.flowjo.com">https://www.flowjo.com</a>                                                                                                                             |
| nf-core/rnaseq pipeline (v3.3)                                                                                            | <a href="#">(Patel et al. 2021)</a>      | <a href="https://nf-co.re/rnaseq">https://nf-co.re/rnaseq</a>                                                                                                                           |
| nf-core/clipseq pipeline (v1.0.0)                                                                                         | <a href="#">(Ewels et al. 2020)</a>      | <a href="https://nf-co.re/clipseq">https://nf-co.re/clipseq</a>                                                                                                                         |
| DESeq2 (v3.15)                                                                                                            | <a href="#">(Love et al. 2014)</a>       | <a href="https://bioconductor.org/packages/release/bioc/html/DESeq2.html">https://bioconductor.org/packages/release/bioc/html/DESeq2.html</a>                                           |
| rmats2sashimiplo (v2.0.4)                                                                                                 | <a href="#">(Shen et al. 2014)</a>       | <a href="https://github.com/Xinglab/rmats2sashimiplo">https://github.com/Xinglab/rmats2sashimiplo</a>                                                                                   |
| FastQC (v0.11.8)                                                                                                          | Babraham Institute                       | <a href="https://www.bioinformatics.babraham.ac.uk/projects/fastqc/">https://www.bioinformatics.babraham.ac.uk/projects/fastqc/</a>                                                     |
| STAR (v2.6.1b)                                                                                                            | <a href="#">(Dobin et al. 2013)</a>      | <a href="https://github.com/alexdobin/STAR">https://github.com/alexdobin/STAR</a>                                                                                                       |
| SAMtools (v1.9)                                                                                                           | <a href="#">(Li et al. 2009)</a>         | <a href="http://www.htslib.org/">http://www.htslib.org/</a>                                                                                                                             |
| rMATS (v4.1.2)                                                                                                            | <a href="#">(Shen et al. 2014)</a>       | <a href="https://github.com/Xinglab/rmats-turbo">https://github.com/Xinglab/rmats-turbo</a>                                                                                             |

|                            |                                  |                                                                                                                 |
|----------------------------|----------------------------------|-----------------------------------------------------------------------------------------------------------------|
| cliplotr (v1.0.0)          | (Chakrabarti <i>et al.</i> 2021) | <a href="https://github.com/u1elab/cliplotr">https://github.com/u1elab/cliplotr</a>                             |
| QGRS Mapper                | (Kikin <i>et al.</i> 2006)       | <a href="https://bioinformatics.ramapo.edu/QGRS/index.php">https://bioinformatics.ramapo.edu/QGRS/index.php</a> |
| Other                      |                                  |                                                                                                                 |
| MatTek glass-bottom dishes | MatTek                           | Cat#P35G-1.0-14-C                                                                                               |

## References

- Chakrabarti AM, Capitanichik C, Ule J & Luscombe NM (2021) cliplotr - a comparative visualisation and analysis tool for CLIP data. *bioRxiv*: 2021.09.10.459763
- Dobin A, Davis CA, Schlesinger F, Drenkow J, Zaleski C, Jha S, Batut P, Chaisson M & Gingeras TR (2013) STAR: ultrafast universal RNA-seq aligner. *Bioinformatics* 29: 15–21
- Ewels PA, Peltzer A, Fillinger S, Patel H, Alneberg J, Wilm A, Garcia MU, Di Tommaso P & Nahnsen S (2020) The nf-core framework for community-curated bioinformatics pipelines. *Nat Biotechnol* 38: 276–278
- Kikin O, D'Antonio L & Bagga PS (2006) QGRS Mapper: a web-based server for predicting G-quadruplexes in nucleotide sequences. *Nucleic Acids Res* 34: W676–82
- Lerner MR, Boyle JA, Hardin JA & Steitz JA (1981) Two novel classes of small ribonucleoproteins detected by antibodies associated with lupus erythematosus. *Science* 211: 400–402
- Li H, Handsaker B, Wysoker A, Fennell T, Ruan J, Homer N, Marth G, Abecasis G, Durbin R & Others (2009) 1000 genome project data processing subgroup. The sequence alignment/map format and SAMtools. *Bioinformatics* 25: 2078–2079
- Li W, Xu H, Xiao T, Cong L, Love MI, Zhang F, Irizarry RA, Liu JS, Brown M & Liu XS (2014) MAGeCK enables robust identification of essential genes from genome-scale CRISPR/Cas9 knockout screens. *Genome Biol* 15: 554
- Love MI, Huber W & Anders S (2014) Moderated estimation of fold change and dispersion for RNA-seq data with DESeq2. *Genome Biol* 15: 550
- Metzakopian E, Strong A, Iyer V, Hodgkins A, Tzelepis K, Antunes L, Friedrich MJ, Kang Q, Davidson T, Lamberth J, *et al* (2017) Enhancing the genome editing toolbox: genome wide CRISPR arrayed libraries. *Sci Rep* 7: 2244
- Patel H, Ewels P, Peltzer A, Hammarén R, Botvinnik O, Sturm G, Moreno D, Vemuri P, silviamorins, Pantano L, *et al* (2021) nf-core/rnaseq: nf-core/rnaseq v3.5 - Copper Chameleon Zenodo
- Pawlowski M, Ortmann D, Bertero A, Tavares JM, Pedersen RA, Vallier L & Kotter MRN (2017) Inducible and Deterministic Forward Programming of Human Pluripotent Stem Cells into Neurons, Skeletal Myocytes, and Oligodendrocytes. *Stem Cell Reports* 8: 803–812

Schindelin J, Arganda-Carreras I, Frise E, Kaynig V, Longair M, Pietzsch T, Preibisch S, Rueden C, Saalfeld S, Schmid B, *et al* (2012) Fiji: an open-source platform for biological-image analysis. *Nat Methods* 9: 676–682

Shen S, Park JW, Lu Z-X, Lin L, Henry MD, Wu YN, Zhou Q & Xing Y (2014) rMATS: robust and flexible detection of differential alternative splicing from replicate RNA-Seq data. *Proc Natl Acad Sci U S A* 111: E5593–601

Szklarczyk D, Gable AL, Nastou KC, Lyon D, Kirsch R, Pyysalo S, Doncheva NT, Legeay M, Fang T, Bork P, *et al* (2020) The STRING database in 2021: customizable protein–protein networks, and functional characterization of user-uploaded gene/measurement sets. *Nucleic Acids Res* 49: D605–D612

Zhou Y, Zhou B, Pache L, Chang M, Khodabakhshi AH, Tanaseichuk O, Benner C & Chanda SK (2019) Metascape provides a biologist-oriented resource for the analysis of systems-level datasets. *Nat Commun* 10: 1523
